1 **Contextual flexibility in *Pseudomonas aeruginosa* central carbon metabolism during growth**  
2 **in single carbon sources**

3 Stephen K. Dolan<sup>1</sup>, Michael Kohlstedt<sup>2</sup>, Stephen Trigg<sup>1</sup>, Pedro Vallejo Ramirez<sup>3</sup>, Christoph  
4 Wittmann<sup>2</sup>, Clemens F. Kaminski<sup>3</sup>, and Martin Welch<sup>1†</sup>

5 <sup>1</sup>Department of Biochemistry, University of Cambridge, United Kingdom

6 <sup>2</sup>Institute for Systems Biotechnology, Saarland University, Saarbrücken, Germany

7 <sup>3</sup>Department of Chemical Engineering, University of Cambridge, United Kingdom

8 <sup>†</sup>To whom correspondence should be addressed.

9 Tel: +44 1223 333 653, e-mail: [mw240@cam.ac.uk](mailto:mw240@cam.ac.uk)

10

11 Running title: ***P. aeruginosa* central carbon metabolism**

12

13 Keywords: ***Pseudomonas aeruginosa*, carbon metabolism, denitrification, proteomics, carbon**  
14 **flux, acetate metabolism, glycerol metabolism**

15

16

17

18

19

20

21

22 **Abstract**

23 *Pseudomonas aeruginosa* is an opportunistic human pathogen, particularly noted for causing  
24 infections in the lungs of people with cystic fibrosis (CF). Previous studies have shown that the  
25 gene expression profile of *P. aeruginosa* appears to converge towards a common metabolic  
26 program as the organism adapts to the CF airway environment. However, at a systems level, we  
27 still have only a limited understanding of how these transcriptional changes impact on  
28 metabolic flux. To address this, we analysed the transcriptome, proteome and fluxome of *P.*  
29 *aeruginosa* grown on glycerol or acetate. These carbon sources were chosen because they are  
30 the primary breakdown products of airway surfactant, phosphatidylcholine, which is known to  
31 be a major carbon source for *P. aeruginosa* in the CF airways. We show that the flux of carbon  
32 through central metabolism is radically different on each carbon source. For example, the  
33 newly-recognised EDMP cycle plays an important role in supplying NADPH during growth on  
34 glycerol. By contrast, the EDMP cycle is attenuated during growth on acetate, and instead,  
35 NADPH is primarily supplied by the isocitrate dehydrogenase(s)-catalyzed reaction. Perhaps  
36 more importantly, our proteomic and transcriptomic analyses reveal a global remodelling of  
37 gene expression during growth on the different carbon sources, with unanticipated impacts on  
38 aerobic denitrification, electron transport chain architecture, and the redox economy of the  
39 cell. Collectively, these data highlight the remarkable metabolic plasticity of *P. aeruginosa*; a  
40 plasticity which allows the organism to seamlessly segue between different carbon sources,  
41 maximising the energetic yield from each.

42

43

#### 44 **Importance**

45 *Pseudomonas aeruginosa* is an opportunistic human pathogen, well-known for causing  
46 infections in the airways of people with cystic fibrosis. Although it is clear that *P. aeruginosa* is  
47 metabolically well-adapted to life in the CF lung, little is currently known about how the  
48 organism metabolises the nutrients available in the airways. In this work, we use a combination  
49 of gene expression and isotope tracer (“fluxomic”) analyses to find out exactly where the input  
50 carbon goes during growth on two CF-relevant carbon sources, acetate and glycerol (derived  
51 from the breakdown of lung surfactant). We find that carbon is routed (“fluxed”) through very  
52 different pathways during growth on these substrates, and that this is accompanied by an  
53 unexpected remodelling of the cell’s electron transfer pathways. Having access to this  
54 “blueprint” is important because the metabolism of *P. aeruginosa* is increasingly being  
55 recognised as a target for the development of much-needed antimicrobial agents.

56

57

58

59

60

61

62

63

## 64 **Introduction**

65 *Pseudomonas aeruginosa* (Pa) is an opportunistic pathogen. This cosmopolitan microbe has  
66 become one of the most frequent causative agents of nosocomial infection [1]. It is also well-  
67 known for colonising the airways of cystic fibrosis (CF) patients; a spatially and chemically  
68 heterogeneous environment characterised by gradients of oxygen and nutrients. To survive in  
69 this niche, Pa must therefore overcome numerous challenges [2,3]. Indeed, recent studies have  
70 suggested that CF-adapted *P. aeruginosa* exhibits distinct physiological adaptations, including a  
71 tailored preference for specific carbon sources, increased requirement for oxygen, and  
72 decreased fermentation [4]. Moreover, and despite extensive studies into the physiology and  
73 metabolism of *P. aeruginosa*, we still lack a clear understanding of how the growth and  
74 assimilation of carbon is controlled in this organism. Uncovering these processes is central to  
75 developing future treatment strategies.

76 Carbon source utilisation by *P. aeruginosa* is hierarchical, and the organism displays marked  
77 diauxy during growth on mixed carbon sources [5]. *In vitro*, the preferred carbon source of  
78 domesticated *P. aeruginosa* strains includes tricarboxylic acid cycle intermediates and amino  
79 acids. Intriguingly, and unlike many enteric bacteria, glucose is not especially favoured, even  
80 though it is present at millimolar concentrations in CF secretions [6]. Instead, adapted CF airway  
81 isolates seem to prefer glycerol during exponential growth. The precise reason for this is  
82 unclear, as glycerol *per se* is not abundant in CF sputum [4]. However, the surfactant  
83 phosphatidylcholine (PC) is abundant in the CF airways, and *P. aeruginosa* is known to secrete  
84 lipases which can cleave PC to yield phosphorylcholine, glycerol, and long-chain fatty acids (FAs)  
85 such as palmitate. The liberated glycerol is then metabolised through the action of enzymes

86 encoded by the *glp* operon, whereas the FAs are iteratively degraded by  $\beta$ -oxidation to yield  
87 acetyl-CoA. The acetyl moiety is then shuttled into the TCA cycle and glyoxylate shunt to  
88 generate energy and gluconeogenic precursors for biomass production, respectively. Other  
89 sources of short chain fatty acids in the CF airways have also been recently identified [7].  
90 Indeed, acetate derived from tracheobronchial mucin breakdown by anaerobes has been  
91 reported at concentrations in excess of 5 mM in CF sputum, and reconstitution of the CF airway  
92 microbiota in mucin-containing medium *in vitro* leads to >30 mM acetate accumulating [7].  
93 Glycerol and acetate metabolism therefore occupy an important crossroads in *P. aeruginosa*  
94 pathophysiology [8]. Glycerol is also a preferred carbon source for alginate synthesis by CF  
95 isolates of *P. aeruginosa* and promotes the appearance of mucoid variants when present at  
96 high concentrations [9].

97 Despite the obvious importance of these substrates for pathophysiology, we still do not know  
98 how glycerol and acetate impact on the metabolism, redox balance, and gene expression  
99 profile of *P. aeruginosa*. Much of what we think we know has been gleaned by extrapolation  
100 from other bacterial species, yet those species often occupy very different niches compared  
101 with *P. aeruginosa*, and display different substrate preferences. To redress this, in the current  
102 work, we use a combination of 'omics approaches (transcriptomics, proteomics, and [<sup>13</sup>C]  
103 fluxomics), coupled with reverse genetics, to systematically investigate the pathway(s) of  
104 carbon assimilation during growth on acetate and glycerol. Surprisingly, not only do these  
105 different carbon sources lead to a “rewiring” of central metabolism; they also give rise to  
106 profound changes in the expression of pathogenicity-associated functions including  
107 denitrification, redox balance mechanisms and the electron transport chain. These data

108 underline the striking metabolic flexibility of *P. aeruginosa*, which allows this organism to carry  
109 out efficient, real-time free energy conservation, a trait which is likely to aid its ability to  
110 proliferate in diverse environmental conditions.

## 111 **Results**

### 112 **Comparative transcriptomic, proteomic and fluxomic analysis of PAO1 cultured on glycerol or** 113 **acetate as a sole carbon sources reveals global changes in central carbon metabolism.**

114 We first examined the growth characteristics of *P. aeruginosa* during cultivation on acetate and  
115 glycerol as single carbon sources. This revealed that *P. aeruginosa* grows more slowly in glycerol  
116 (growth rate,  $\mu_{\max} = 0.37 \pm 0.01 \text{ h}^{-1}$ ) than it does in acetate ( $\mu_{\max} = 0.80 \pm 0.01 \text{ h}^{-1}$ ), glucose ( $\mu_{\max} =$   
117  $0.88 \pm 0.05 \text{ h}^{-1}$ ) or succinate ( $\mu_{\max} = 0.87 \pm 0.05 \text{ h}^{-1}$ ) (Figure S2). To investigate this further, we  
118 examined the transcriptome, proteome and fluxome of *P. aeruginosa* during the assimilation of  
119 glycerol and acetate. Our analysis was carried out on cells grown to mid-exponential phase  
120 ( $\text{OD}_{600} = 0.5$ ) in baffled shake flasks containing MOPS-buffered media. This allowed us to  
121 elucidate specific impact of carbon source utilization on *P. aeruginosa* metabolism and  
122 physiology without the confounding factors of nutrient and oxygen limitation that accompany  
123 entry into the stationary phase.

124 Acetate and glycerol have different entry points into *P. aeruginosa* central carbon metabolism,  
125 and are also thought to have distinct effects on redox metabolism [10–13]. We therefore  
126 anticipated a carbon source-specific impact on the expression of enzymes (and corresponding  
127 fluxes) involved in the relevant pathways. These pathways are summarised in Figure 1.

128 RNA-Seq transcriptomic analyses on quadruplicate biological replicates yielded quantification of  
129 the mRNA levels from 5578 genes. After normalisation and statistical analysis (Figure S1 A-C),  
130 we identified 389 genes displaying increased expression on acetate, and 364 genes that  
131 displayed increased expression on glycerol ( $p$ -value  $\leq 0.01$ ,  $\log_2$  fold change  $\geq 2$  or  $\leq -2$ ) (File S1).  
132 A selection of these modulated genes were verified using promoter-luciferase transcriptional  
133 fusions (Figure S3) [14].

134 A complementary proteomic analysis reproducibly detected a total of 3921 proteins across  
135 three replicates for each condition. To our knowledge, this is the most comprehensive (in terms  
136 of coverage) transcriptome and proteome analysis carried out on *P. aeruginosa* to date.  
137 Following normalisation and statistical analysis (Figure S1), we identified 429 proteins that  
138 showed increased abundance during growth on acetate, and 402 proteins displaying increased  
139 expression on glycerol ( $p$ -value  $\leq 0.01$ ,  $\log_2$  fold change  $\geq 1$  or  $\leq -1$ ) (File S1). There was a clear  
140 relationship between the transcriptome and proteome fold-changes, particularly with respect  
141 to central carbon metabolism (Figure 2, File S3).

142 To allow for a more detailed analysis of the 'omic alterations between these conditions, we  
143 used the proteomaps web service [15] to illustrate the statistically significant changes ( $p$ -value  
144  $\leq 0.01$ ,  $\log_2$  fold change  $\geq 1$  or  $\leq -1$ ) as Voronoi tree maps. This provided a global overview of the  
145 proteomic consequences of growth in each carbon source. As shown in Figure 3 most of the  
146 proteomic changes were centred around 'central carbon metabolism', 'biosynthesis', 'signalling  
147 and cellular process' and 'energy metabolism'.

148 Several recent studies have analysed the metabolic interactions of clinically-relevant bacteria  
149 within their host environment [16,17] and metabolic differences between mutant strains [18].  
150 However, published fluxome studies for *Pseudomonas* species are scarce. In addition, all *P.*  
151 *aeruginosa* metabolic flux analysis (MFA) studies to date have been carried out using glucose as  
152 a sole carbon source [19–22], yet this substrate is not thought to play a major role during CF  
153 airway colonization [6,23,24]. To provide insight into the absolute metabolic fluxes of *P.*  
154 *aeruginosa* during growth on acetate and glycerol, we carried out a <sup>13</sup>C fluxome analysis. This  
155 was done by measuring the mass isotopomer distributions of proteinogenic amino acids and  
156 cell carbohydrates (glycogen, glucosamine) using three separate tracers per carbon source  
157 (*Materials and Methods*) [25]. The calculated relative fluxes for the wild-type cultured on  
158 labelled glycerol or acetate are shown in Figure 4. Comparison of the flux maps, in combination  
159 with the proteomic/transcriptomic data, generated an unparalleled insight into the central  
160 carbon metabolic network(s) of *P. aeruginosa*.

161 **Glycerol metabolism.** During growth on glycerol, there was strong induction of the glycerol  
162 uptake system at both the proteomic and transcriptomic level (Figure 2, File S1). Glycerol is  
163 assimilated through the process of uptake (GlpF), phosphorylation (GlpK) and dehydrogenation  
164 (GlpD) to yield dihydroxyacetone phosphate (DHAP) [26–28]. Commensurate with this, the  
165 expression of all three enzymes/transporters (and their corresponding transcripts) was strongly  
166 stimulated during growth on glycerol.

167 Once synthesised, DHAP has two possible fates. One is anabolic. Here, DHAP is isomerised to  
168 generate glyceraldehyde 3-phosphate (G3P) through the action of triose phosphate isomerase  
169 (TpiA). DHAP and G3P are subsequently converted into fructose 1,6-bisphosphate (F1,6BP),



170 thence to fructose 6-phosphate (F6P) and finally, to glucose 6-phosphate (G6P) through the  
171 action of Fda, Fbp and Pgi, respectively. This route is a necessary prerequisite for the generation  
172 of hexose sugars for cell wall synthesis and biomass production. The alternative fate of DHAP is  
173 catabolic. Here, G3P is converted to 1,3-bisphosphoglycerate for glycolytic energy production  
174 [29]. However, recent analyses of carbon fluxes in *Pseudomonas putida* suggests that the  
175 seemingly distinct anabolic and catabolic fates of DHAP/G3P may be more closely intertwined  
176 than previously thought, and that a proportion of the triose phosphate carbon skeletons are  
177 recycled rather than continuing to pyruvate *via* the lower glycolytic reactions [30]. This “EDEMP  
178 cycle” incorporates elements of the Entner-Doudoroff (ED) pathway, Embden-Meyerhof-Parnas  
179 (EMP) pathway, and Pentose Phosphate (PP) pathway. In glucose-grown *P. aeruginosa* and *P.*  
180 *putida* the EDEMP cycle operates in a markedly asymmetrical manner, with most (ca. 90%) of  
181 the flux proceeding through the ED pathway catalysed reactions; glucose → gluconate → 6-  
182 phosphogluconate → 2-keto-3-deoxy-6-phosphogluconate → G3P/pyruvate [25]. Intriguingly,  
183 and in spite of the anticipated demand for hexose synthesis, our data indicate that during  
184 growth on glycerol this asymmetry is retained, since the enzymes catalysing the “catabolic”  
185 reactions (Zwf, Pgl, Edd and Eda) are strongly up-regulated, whereas the enzymes catalysing the  
186 “anabolic” reactions (TpiA, Fda, Fbp and Pgi) remain relatively unaffected. We also note that  
187 glucokinase (Glk) and gluconokinase (GntK) were up-regulated during growth on glycerol.  
188 Intriguingly, this indicates that even in the absence of glucose, glycerol stimulates expression of  
189 the full ED glycolytic pathway [31].

190 Consistent with the proteomic/transcriptomic data, when *P. aeruginosa* was grown on glycerol,  
191 the fluxomics indicated that about 15% of the triose phosphates (G3P + DHAP) were diverted

192 into the EDMP cycle to form hexose phosphates [30]. Hexose generation is necessary for the  
193 synthesis of fructose 6-phosphate (F6P) and glucose 6-phosphate (G6P), required for biomass  
194 production. This recycling may also have a secondary function, since it generates NADPH  
195 through the action of glucose 6-phosphate dehydrogenase (Zwf). NADPH is a source of reducing  
196 agent for anabolism, and for dealing with oxidative insult [30]. However, the majority of the  
197 glycerol-derived carbon was oxidized to pyruvate through reactions in the lower half of the ED  
198 pathway. This notwithstanding, a significant amount of pyruvate was also generated from TCA-  
199 derived malate *via* the action of malic enzyme, feeding the so-called “pyruvate shunt”. The  
200 pyruvate shunt (a cyclical series of reactions converting malate → pyruvate → oxaloacetate →  
201 malate) generates NADPH for anabolism at the cost of consuming one equivalent of ATP. *P.*  
202 *aeruginosa* lacks phosphogluconate dehydrogenase activity (a major source of NADPH in many  
203 other species), so this apparently futile cycling reaction may be of major importance for growth.  
204 Indeed,  $> \frac{2}{3}$  of the carbon in the malate pool was shuttled back to pyruvate through the action  
205 of malic enzyme, with  $< \frac{1}{3}$  being converted to oxaloacetate *via* the malate dehydrogenase  
206 reaction. Overall, glycerol metabolism seems to be characterised by operation of the EDMP  
207 cycle, net catabolism of G3P to pyruvate, and cycling of the latter through the pyruvate shunt.

208 **Acetate metabolism.** Growth on acetate as a sole carbon source elicited a similarly informative  
209 set of changes. There was a strong induction of the glyoxylate shunt enzymes (AceA and GlcB),  
210 which are known to be essential for growth on acetate [32,33], and of enzymes directly  
211 involved in acetate activation (such as AcsA, AckA and Pta) and acetate uptake (PA3234) [34].  
212 The TCA cycle-associated enzymes were almost all up-regulated during growth on acetate, as  
213 was the membrane-bound malate-quinone oxidoreductase, MqoB (Figure 2). Unlike many

214 bacteria, *P. aeruginosa* does not encode a soluble NADH-producing malate dehydrogenase, and  
215 MqoB directly donates the abstracted electrons to the membrane quinone pool [35].

216 Carbon fluxes in acetate-grown cultures were very different from those observed in glycerol-  
217 grown cells. Firstly, net flux through the lower reactions of the ED pathway was in the  
218 gluconeogenic direction. Second, the flow of carbon through the EDEMP cycle was much lower  
219 than that observed in glycerol, and flux terminated at the gluconeogenic end-point, G6P. The  
220 absence of flux through the G6P dehydrogenase (Zwf) reaction following this point is significant,  
221 since this reaction is often thought of as a major source of NADPH for anabolism. Third, and  
222 compounding this, the extent of carbon cycling through the NADPH-producing pyruvate shunt  
223 was low. Fourth, most of the carbon for anabolism was derived from oxaloacetate rather than  
224 malate. Presumably, this may reflect the increased rate of conversion of malate to oxaloacetate  
225 by the acetate-induced malate:quinone oxidoreductase (MqoB). However, perhaps the most  
226 notable difference was that during steady-state growth on acetate, around  $\frac{1}{3}$  of the carbon  
227 reaching the TCA cycle-glyoxylate shunt branchpoint was redirected into the glyoxylate shunt.  
228 [In glycerol-grown cells, only around 3% of the carbon reaching this branchpoint was redirected  
229 to the glyoxylate shunt.] The glyoxylate shunt serves to supply the cell with malate and thence  
230 (following the MqoB-catalyzed conversion) also the gluconeogenic precursor, oxaloacetate. In  
231 an elegant feedback loop, high levels of oxaloacetate (such as would accumulate if the NADPH  
232 supply for anabolism was limiting) stimulate the activity of one of the isocitrate dehydrogenase  
233 isozymes, IDH, thereby restoring flux through the TCA cycle [36]. One outcome of this is that  
234 NADPH levels become replenished because the IDH-catalyzed reaction is a major source of this  
235 coenzyme *in vivo*. This presumably relieves the limitation on oxaloacetate usage in anabolism.

236 At the steady state, our flux data show that around  $\frac{2}{3}$  of the carbon flowing through the  
237 branchpoint is fluxed through the isocitrate dehydrogenases.

238 Our flux data show that no carbon passes through the NADPH-generating steps of the ED  
239 pathway during growth on acetate. So far, we have primarily framed our assessment of these  
240 observations around the need for NADPH in anabolism. However, it has not escaped our  
241 attention that NADPH limitation may impact on infection too. Several earlier workers have  
242 suggested that flux through the ED pathway may confer an additional benefit on *P. aeruginosa*  
243 by providing sufficient reducing power (NADPH) to counteract host-mediated oxidative stress  
244 [37,38]. Whereas our data neither confirm nor refute this notion, we show here that four major  
245 NADPH-supplying reactions are accessible, depending on the substrate; transhydrogenation  
246 (NADH  $\rightarrow$  NADPH), the EDEMP cycle, the pyruvate shunt (malic enzyme), and the isocitrate  
247 dehydrogenase(s)-catalysed reaction.

248 **Beyond central metabolism – growth in acetate induces extensive remodelling of the electron**  
249 **transport chain.**

250 Aerobic respiration re-oxidizes NADH, thereby generating energy, maintaining redox  
251 homeostasis, and ensuring continued oxidative metabolism [39] [40]. Bacteria are known to  
252 coordinate the composition of the electron transport chain (ETC), and in particular, levels of the  
253 terminal oxidases, according to their metabolic needs [41]. The ETC of *P. aeruginosa* contains  
254 three NADH dehydrogenases; the multi-subunit proton pumping NDH-1 (encoded by *nuoA-N*  
255 (PA2637-PA2649)), the HQNO-resistant proton pump Nqr (encoded by *nqrA-F* (PA2994-2999)),  
256 and a single-subunit flavoenzyme which does not participate in ion translocation (NDH-2,

257 encoded by *ndh*, PA4538) [42]. All three dehydrogenases displayed increased expression during  
258 growth on acetate, particularly at the protein level (file S1).

259 A characteristic feature of the *P. aeruginosa* respiratory chain is its use of high-affinity terminal  
260 oxidases, even during aerobic growth. This unusual wiring of the *P. aeruginosa* ETC is thought to  
261 drive the formation of a microaerobic environment; a trait that may give the pathogen a fitness  
262 advantage during infection [43]. Expression of the terminal oxidases in *P. aeruginosa* is directly  
263 or indirectly controlled by a two-component system, RoxS-RoxR. The kinase, RoxS, is thought to  
264 sense the redox status of the respiratory chain, either by titrating the redox status of the  
265 ubiquinone/ubiquinol (UQ) pool or by responding to electron flux through the terminal  
266 oxidases. UQ acts as the electron donor for complex III, the quinol oxidases (Cyo), and the  
267 cyanide-insensitive terminal oxidase, CIO. Complex III transfers electrons to a c-type  
268 cytochrome, which then acts as the electron donor for the terminal cytochrome oxidases Cox,  
269 Cco1, or Cco2. Cco1 is constitutively expressed at high levels, whereas Cco2 is thought to  
270 support growth under low oxygen tension (~2% O<sub>2</sub>), as it is regulated by the anaerobic sensor,  
271 Anr [44]. The 'omics data indicated that Cco1, Cco2, Cyo and complex III subunits (encoded by  
272 PA4429-PA4431) are highly-expressed during growth on acetate, whereas the Cox oxidase was  
273 more highly-expressed during growth on glycerol. This may be a strategy to limit oxidative  
274 stress, as Cox has a high H<sup>+</sup>/e<sup>-</sup> ratio and can extract more energy per unit of carbon [45,46]. The  
275 greater expression of Cox during growth on glycerol may be a consequence of RoxSR-mediated  
276 inhibition of *cox* gene expression during growth on acetate (File S1) [47].

277 Levels of the soluble pyridine nucleotide transhydrogenase, Sth (PA2991), were increased ca. 3-  
278 fold during growth on acetate. Pyridine nucleotide transhydrogenases catalyse the reversible  
279 reduction of either  $\text{NAD}^+$  or  $\text{NADP}^+$  by NADPH or NADH (respectively). The primary physiological  
280 role of Sth is thought to be in the  $\text{NAD}^+$ -dependent re-oxidation of NADPH [48]. Re-oxidation of  
281 excess NADPH is likely to be important during growth on acetate, as extensive catabolism of  
282 this substrate through the TCA cycle generates more NADPH than is required for biosynthesis  
283 [49]. Interestingly, the NAD(P) transhydrogenase encoded by *pntAA* and *pntAB* was not  
284 differentially expressed during growth on acetate or glycerol, suggesting that Sth is the main  
285 transhydrogenase used by *P. aeruginosa* in these conditions [48].

286 As noted earlier, *P. aeruginosa* cultured in glycerol has a significantly slower growth rate than  
287 cells grown in acetate, glucose or succinate (Figure S2). This lower growth rate may result in a  
288 lower metabolic demand, meaning these cells do not require high expression of terminal  
289 oxidases and other ETC components. By contrast, higher growth rates may result in  
290 accumulation of NADH due to the rate-limitations inherent in ETC-dependent re-oxidation. This  
291 is because faster growing cells are known to increase their length [53], suggesting that they are  
292 likely have lower surface-to-volume ratios. This limits the membrane's physical capacity for  
293 accommodating respiratory complexes, and thereby also limits NADH re-oxidation [50]. To  
294 investigate this possibility further, we examined the length of exponentially-growing *P.*  
295 *aeruginosa* cells grown in MOPS media with various carbon sources. To do this, we introduced  
296 an eGFP-expressing plasmid (pMF230) to PAO1 and cultured the strain in MOPS medium  
297 containing different carbon sources [51]. When cells reached an  $\text{OD}_{600}$  of 0.5, they were fixed  
298 and examined by fluorescence microscopy. As shown in Figure S6 (and File 3), the slower-

299 growing cells in MOPS-glycerol were indeed significantly shorter than cells grown in acetate,  
300 glucose or succinate [52]. This supports the notion that *P. aeruginosa* cell size (and hence,  
301 surface-to-volume ratio) is dependent on growth rate.

### 302 **Induction of the denitrification apparatus in *P. aeruginosa* during aerobic growth**

303 When O<sub>2</sub> is limiting, *P. aeruginosa* can use nitrate as an alternative electron acceptor. This is  
304 made possible by the presence of nitrate reductase (NAR) which can accept electrons from the  
305 UQ pool, and nitrite reductase (NIR), which receives electrons *via* complex III and cytochrome c  
306 [53]. Denitrification is thought to be an important pathway to support the anoxic growth of *P.*  
307 *aeruginosa* in the CF airways [54,55] and nitrate is a known component of human body fluids,  
308 arising from diet and NO auto-oxidation. Indeed, NO<sub>3</sub><sup>-</sup> concentrations in the CF airways have  
309 been reported between 73 μM – 792 μM, with an average of 348 μM [56]. Molecular oxygen is  
310 therefore not essential for growth in this environment.

311 The gene clusters encoding the dissimilatory nitrate reductases (*nar* and *nap*) and those  
312 encoding nitrous oxide (N<sub>2</sub>O) utilisation (*nos*) are unlinked, whereas the genes encoding nitrite  
313 respiration (*nir*) and nitric oxide respiration (*nor*) are adjacent. In addition to the enzymes  
314 above, the denitrification operons also harbour genes for ancillary functions such as cofactor  
315 synthesis, transport and protein maturation [53]. Both the proteomic and transcriptomic  
316 analyses showed activation of the denitrification pathways following growth in MOPS-acetate  
317 (File S1). This was surprising, since the cultures were harvested during exponential growth in  
318 baffled, well-aerated conical flasks without added nitrate. This is an important point, because  
319 denitrification in *P. aeruginosa* is known to be under the control of the master regulator Dnr. In

320 turn, Dnr is under the control of the anaerobic transcriptional regulator Anr. The latter contains  
321 an oxygen sensitive [4Fe-4S]<sup>2+</sup> cluster and is thought to be active only under conditions of  
322 oxygen limitation. In contrast, Dnr is a nitric oxide (NO) sensor, and contains a ferrous heme.  
323 Dnr protein expression was up-regulated 2.8-fold during growth on acetate compared with  
324 glycerol (File S1). Previous work has shown that, in addition to Dnr-mediated regulation, the  
325 *narGHJI* operon is also activated by the NarXL two-component system. The NarX and NarL  
326 proteins were up-regulated 2-fold during growth on acetate. Taken together, these data  
327 indicate that in spite of the presence of molecular oxygen and the absence of added nitrate,  
328 growth on acetate strongly induces the denitrification apparatus in comparison with glycerol.  
329 We conclude that the denitrification apparatus and components required for aerobic  
330 respiration are expressed simultaneously during growth on acetate [57].

### 331 ***P. aeruginosa* cellular NAD(P)(H) ratios change in a carbon source dependent manner**

332 By summing the fluxes through reactions that either produce or consume NADPH or ATP, we  
333 were able to calculate the relative contributions of different metabolic reactions to the redox  
334 (NADPH) and energy (ATP) balances during growth on each carbon source (Figure 5). This  
335 revealed that cells grown on glycerol obtain their NADPH from a variety of reactions, whereas  
336 acetate-grown cells are heavily-reliant on NADPH derived from the isocitrate dehydrogenase(s)  
337 reaction. Moreover, most of the NADPH generated during growth on acetate was used in  
338 anabolism. With regards to ATP, cells grown on glycerol were effectively “over-supplied” with  
339 this reagent, maintaining a substantial “operating surplus” of ATP. In contrast, the supply of ATP  
340 in cells grown on acetate was essentially identical to the metabolic demand. The most likely  
341 reason for this is the 2 x ATP ‘cost’ of acetate uptake and activation [58]. During growth on



342 glycerol, the cell generates 2.6 moles of ATP per mole of C, whereas just 1.1 moles of ATP are  
343 generated on acetate. This “energy deficit” may explain why the cell induces additional  
344 mechanisms to maximise energy production during growth on acetate (e.g., high affinity  
345 electron acceptors, increased denitrification, increased Sth transhydrogenase expression etc  
346 (File S1)).

347 We anticipated that the faster growth rate (Figure S2) and TCA cycle driven metabolism (Figure  
348 2) during growth on acetate would result in an increased rate of respiration, and that this might  
349 drive the NAD(P)H/NAD(P)<sup>+</sup> ratio towards a more reduced state [50]. This was indeed the case  
350 (Figure S2) indicating that carbon source alone is sufficient to alter the intracellular redox  
351 economy of *P. aeruginosa*. We next investigated what might be driving this increased  
352 NADH/NAD<sup>+</sup> ratio during growth on acetate. Microorganisms display an elevated NADH/NAD<sup>+</sup>  
353 ratio when NADH re-oxidation is slowed by limitation of electron acceptors [59], or when the  
354 metabolism of certain carbon sources outpaces the capacity of the *P. aeruginosa* ETC to re-  
355 oxidise the coenzyme. This may explain why cells grown in acetate appear to scavenge for  
356 alternative electron acceptors (such as nitrate, as indicated by the increased expression of the  
357 denitrification apparatus). To determine if aerobic denitrification might be used by *P.*  
358 *aeruginosa* to correct the reduced status of its redox pool, we therefore examined the impact  
359 of nitrate addition on the NADH/NAD<sup>+</sup> ratio. As shown in Figure 7, the addition of 20 mM  
360 nitrate to MOPS-acetate cultures decreased the NADH/NAD<sup>+</sup> ratio during exponential growth.  
361 Absolute quantitation of the NADH and NAD<sup>+</sup> levels (Figure S2) confirmed that the total NAD(H)  
362 and NADP(H) pools were similar in the presence and absence of added nitrate. To confirm that  
363 this drop in the NADH/NAD<sup>+</sup> ratio was due to aerobic denitrification, we generated a deletion

364 mutant in the master transcriptional regulator of denitrification, *dnr*. As expected, nitrate  
365 reductase (NirS) expression was abolished in the *dnr* mutant, and also in an *anr* mutant (Anr  
366 controls the expression of *dnr*) (Figure S4). Crucially, and consistent with findings from other  
367 laboratories showing that nitrate addition has little impact on the NADH:NAD<sup>+</sup> ratio in mutants  
368 defective in denitrification [60], the *dnr* mutant was also defective in nitrate-dependent re-  
369 oxidation of NADH and NADPH (Figure 7). We conclude that aerobic denitrification during  
370 growth on acetate impacts on the redox status of the NAD(P)H/NAD(P)<sup>+</sup> pool.

371

## 372 Discussion

373 Several earlier studies have described the systems-level cellular adjustments that accompany  
374 the growth of industrially-relevant model organisms such as *E. coli*, *Saccharomyces cerevisiae*,  
375 *B. subtilis*, *C. glutamicum*, *B. succiniciproducens*, and *P. putida* in single carbon sources [61–66].  
376 However, and although the accrued metabolic models have made a valuable contribution  
377 towards our “textbook understanding” of microbial metabolism, it is clear that they can be only  
378 loosely extrapolated to other organisms, such as *P. aeruginosa* [67]. Surprisingly, a comparative  
379 ‘omics study has yet to be carried out for *P. aeruginosa* grown on carbon sources relevant to  
380 infection. Overall, carbon preference remains poorly understood for *P. aeruginosa*, even though  
381 it is known to have a profound impact on virulence-associated phenotypes, including toxin  
382 production, biofilm formation and growth rate. In this work, we rectify this by developing a  
383 high-resolution global map of *P. aeruginosa* metabolism during growth on two infection-  
384 relevant carbon sources, acetate and glycerol.

385 Our data indicate a clear relationship between transcript and protein changes in *P. aeruginosa*  
386 for the growth regimens tested [20,36,68]. These expression data enabled us to establish which  
387 metabolic pathways are active in each growth condition, thereby providing an experimentally-  
388 supported framework for interpreting the fluxomic data. This notwithstanding, the fluxomics  
389 highlighted the possibility of additional layers of regulatory complexity involved in fine-tuning  
390 of central carbon metabolism. For example, growth on acetate results in the expression of  
391 three enzymes (the isocitrate dehydrogenases, ICD and IDH, and the isocitrate lyase, ICL), all of  
392 which compete for a shared substrate, isocitrate. These enzymes are known to exhibit radically  
393 different catalytic and regulatory properties compared with their *E. coli* counterparts [36]. In  
394 spite of this, our fluxomic analysis revealed a remarkably similar flux partitioning at the  
395 branchpoint between the TCA cycle and the glyoxylate shunt in both organisms [36].

396 In addition to alterations in central carbon metabolism, we also noted substantial remodelling  
397 of the ETC composition during growth in acetate compared with glycerol. For example, we  
398 noted a substantial increase in the expression of terminal oxidases (*cyo*, *cco1* and *cco2*) during  
399 growth on acetate, and increased *cox* expression during growth on glycerol. This suggests that  
400 different terminal oxidases are employed in different growth conditions, allowing metabolism  
401 to be optimally adjusted for energy generation [69]. Interestingly, growth on mucus has been  
402 previously shown to stimulate *Cyo* expression and to repress *Cco2* expression [70]. Our data  
403 suggest that these observations may be driven by metabolism of one or more mucus-derived  
404 compounds.

405 The ETC alterations that we observed included strong aerobic induction of the denitrification  
406 machinery during growth on acetate. This was unexpected, since denitrification is usually

407 associated with oxygen limitation and microaerobic growth. The signal which leads to this  
408 remodelling of the ETC remains to be elucidated. However, we speculate that these changes in  
409 ETC architecture and composition may be a mechanism to restore redox balance (NADH:NAD<sup>+</sup>  
410 ratio) in the cell [71]. Acetate-grown cells accumulate NADH, so activating alternative  
411 mechanisms (such as the denitrification apparatus) to oxidise NADH may be a homeostatic  
412 attempt to regain an optimal cellular redox status. Consistent with this, the addition of nitrate  
413 to acetate-grown *P. aeruginosa* did lead to a more oxidized NADH:NAD<sup>+</sup> ratio. Moreover, a  
414 mutant ( $\Delta dnr$ ) defective in denitrification, was unable to maintain optimal redox homeostasis.  
415 However, growth was not affected in the  $\Delta dnr$  mutant, perhaps suggesting that the organism  
416 also has additional (possibly compensatory) mechanisms to deal with redox dysregulation  
417 [37,72].

418 Aerobic denitrification has been recently suggested to function as a ‘bet-hedging’ strategy to  
419 anticipate nitrate availability and respond to abrupt anoxia [73,74]. The oxygen-limited  
420 microenvironment in the CF airways is thought to result in *P. aeruginosa* growth by  
421 microaerobic respiration [75]. One possibility is that hybrid respiration (a combination of  
422 aerobic respiration and denitrification) may well be a predominant mechanism of survival in  
423 these conditions [76]. Genes under the control of the transcriptional regulator Anr are also  
424 abundant in *P. aeruginosa* RNA extracted from CF sputum [77–79].

425 A key fundamental question arises from this study – how does *P. aeruginosa* activate the  
426 denitrification system during growth in aerobic conditions? Until now, induction of the  
427 denitrification machinery has been largely attributed to the activity of Anr (and its subordinate  
428 denitrification-specific regulator, Dnr). Anr dimerization is thought to be dependent on the

429 formation of an oxygen-labile  $[4\text{Fe-4S}]^{2+}$ , which is destabilised and disassociates in the presence  
430 of oxygen, abolishing Anr activity. However, there is accruing evidence that Anr may be active  
431 even in the presence of oxygen. For example, Jackson *et al.*, have shown that choline  
432 catabolism leads to aerobic expression of the Anr regulon, suggesting that Anr activity can be  
433 sustained in the presence of oxygen. Also, Anr overexpression in well-aerated cultures increases  
434 the levels of *dnr* transcript 29-fold [80]. Furthermore, the expression of *nir* and *nar* genes has  
435 been shown to increase in late exponential phase cultures compared with stationary phase  
436 cultures of PA14 [81]. This mobilisation of the Anr regulon in the presence of oxygen suggests  
437 that Anr can modulate gene expression without fully intact metallo-centres or dimers. This may  
438 be to assist the cells during the transition to conditions of low oxygen tension [80].

439 Finally, our data demonstrate that *P. aeruginosa* grows more rapidly on acetate than it does in  
440 glycerol, both in terms of specific growth rate (measured as optical density) and cell length  
441 (Figure S6). In order to maintain redox homeostasis in such conditions, cells will often switch to  
442 “overflow metabolism” whereby partially oxidised metabolic intermediates such as acetate are  
443 excreted [59,82]. At first glance, overflow metabolism seems wasteful, although it does allow  
444 them to maximise their growth rate [83]. It is tempting to speculate that aerobic denitrification  
445 in *P. aeruginosa* may also be a form of ‘overflow’ metabolism in which the alternate electron  
446 acceptor nitrate is utilised alongside oxygen in an effort to maintain redox homeostasis.

447

448

449

450

## 451 **Materials and Methods**

### 452 **Growth Conditions**

453 Unless otherwise indicated, *P. aeruginosa* strain PAO1 [84] was routinely grown in lysogeny  
454 broth (LB LENNOX) (Oxoid Ltd) at 37°C with shaking (250 rpm). The strains used in this study are  
455 listed in Table S1. The overnight pre-cultures were started from separate clonal source colonies  
456 on streaked LB agar plates. Strains were cultured in MOPS (morpholinepropanesulfonic acid)  
457 media with the relevant carbon sources [85]. Cell growth was monitored as optical density in a  
458 spectrophotometer at a wavelength of 600 nm (OD<sub>600</sub>). A previously determined conversion  
459 factor of 0.42 g CDW per OD unit was used to calculate biomass specific rates and yields from  
460 the obtained OD<sub>600</sub> values [21].

### 461 **Transcriptomics (RNA-Seq)**

462 PAO1 was grown in 40 mL MOPS with acetate or glycerol as sole carbon sources  
463 (quadruplicate), 37°C with shaking (250 rpm) in baffled flasks (500 mL). An aliquot (5 mL) of  
464 culture was harvested from each sample at OD<sub>600</sub> of 0.5 (exponential growth) and added to an  
465 equal volume of RNAlater®. Samples were then sedimented in an Eppendorf 5810R centrifuge  
466 at 3220 × *g* for 15 min (4°C) and the pellets were stored at -80°C. Total RNA was isolated as  
467 described in [86], followed by phenol-chloroform-isoamyl alcohol extraction and ethanol  
468 precipitation. Ribosomal RNA (rRNA) was then depleted from each sample (5 µg each) using the  
469 bacterial Ribo-Zero rRNA Removal Kit (Illumina). The integrity of the RNA was evaluated using  
470 an RNA 6000 Nano LabChip and an Agilent 2100 Bioanalyzer (Agilent Technologies, Germany).

471 Eight indexed, strand-specific cDNA libraries were prepared, and samples were sequenced on  
472 an Illumina HiSeq 2000 with a 51 bp single-end read length (GATC Biotech, Germany). The  
473 sequencing data are deposited at ArrayExpress (accession number E-MTAB-8374).

#### 474 **Reads mapping and annotations**

475 The resulting FASTQ files were mapped to the PAO1 genome obtained from the Pseudomonas  
476 Genome Database (PDG) (<http://www.pseudomonas.com/>) using TopHat v.2.0.3 [37],  
477 Bowtie v.0.12.8 [38] with a ~97% success rate to generate SAM files. The sequence reads were  
478 adaptor clipped and quality trimmed with trimmomatic [87] with default parameters. Transcript  
479 abundance and differential gene expression were calculated with the program Cufflinks v.2.0.1  
480 [88]. Gene expression levels were normalized using fragments per kilobase of exon per million  
481 mapped reads (FPKM) report values. Genes were considered as induced or repressed, only  
482 when their  $\log_2$  fold change was  $>1$  or  $<-1$ , respectively, and their  $p$ -value was  $<0.01$  (File S1,  
483 Figure S1).

#### 484 **Quantitative proteomic analysis**

485 *P. aeruginosa* cells ( $OD_{600} = 0.5$ , 30 mL) were harvested in identical growth conditions as the  
486 transcriptomics section described above. Pellets were resuspended in lysis buffer (100 mM Tris-  
487 HCl, 50 mM NaCl, 10% (v/v) glycerol, 1 mM tris(2-carboxyethyl)phosphine (TCEP), pH 7.5) with  
488 cOmplete Mini protease inhibitor cocktail (Roche). Following three rounds of sonication ( $3 \times 10$   
489 sec) on ice, supernatants were clarified by sedimentation ( $21130 \times g$ , 15 min,  $4^\circ\text{C}$ ) in an  
490 Eppendorf 5424R centrifuge. Aliquots (100  $\mu\text{g}$ ) of each sample was reduced with TCEP,  
491 alkylated with iodoacetamide and labelled with Tandem Mass Tags (TMTs). TMT labelling was

492 performed according to the manufacturer's protocol  
493 (<https://www.thermofisher.com/order/catalog/product/90110>).

#### 494 **LC-MS/MS**

495 Dried fractions from the high pH reverse-phase separations were resuspended in 30  $\mu$ L of 0.1%  
496 (v/v) formic acid (14 combined fractions). LC-MS/MS experiments were performed using a  
497 Dionex Ultimate 3000 RSLC nanoUPLC (Thermo Fisher Scientific Inc, Waltham, MA, USA) system  
498 and a Lumos Orbitrap mass spectrometer (Thermo Fisher Scientific Inc, Waltham, MA, USA).  
499 Peptides were loaded onto a pre-column (Thermo Scientific PepMap 100 C18, 5 mm particle  
500 size, 100 Å pore size, 300 mm i.d. x 5 mm length) from the Ultimate 3000 auto-sampler with  
501 0.1% (v/v) formic acid for 3 min at a flow rate of 10  $\mu$ L/min. Separation of peptides was  
502 performed by C18 reverse-phase chromatography at a flow rate of 300 nL/min using a Thermo  
503 Scientific reverse-phase nano Easy-spray column (Thermo Scientific PepMap C18, 2 mm particle  
504 size, 100 Å pore size, 75 mm i.d. x 50 cm length). Solvent A was water + 0.1% formic acid and  
505 solvent B was 80% (v/v) acetonitrile, 20% water + 0.1% formic acid. The linear gradient  
506 employed was 2-40% B in 93 min (total LC run time was 120 min including a high organic wash  
507 step and column re-equilibration).

508 The eluted peptides were sprayed into the mass spectrometer by means of an Easy-Spray  
509 source (Thermo Fisher Scientific Inc.). All  $m/z$  values of eluting peptide ions were measured in  
510 an Orbitrap mass analyser, set at a resolution of 120,000 and were scanned between  $m/z$  380-  
511 1500 Da. Data dependent MS/MS scans (Top Speed) were employed to automatically isolate  
512 and fragment precursor ions by collision-induced dissociation (CID, Normalised Collision Energy



513 (NCE): 35%) which were analysed in the linear ion trap. Singly charged ions and ions with  
514 unassigned charge states were excluded from being selected for MS/MS and a dynamic  
515 exclusion window of 70 sec was employed. The top 10 most abundant fragment ions from each  
516 MS/MS event were then selected for a further stage of fragmentation by Synchronous  
517 Precursor Selection (SPS) MS3 [89] in the HCD high energy collision cell using HCD (High energy  
518 Collisional Dissociation, (NCE: 65%). The  $m/z$  values and relative abundances of each reporter  
519 ion and all fragments (mass range from 100-500 Da) in each MS3 step were measured in the  
520 Orbitrap analyser, which was set at a resolution of 60,000. This was performed in cycles of 10  
521 MS3 events before the Lumos instrument reverted to scanning the  $m/z$  ratios of the intact  
522 peptide ions and the cycle continued.

### 523 **Proteomic Data Analysis**

524 Proteome Discoverer v2.1 (Thermo Fisher Scientific) and Mascot (Matrix Science) v2.6 were  
525 used to process raw data files. Data was aligned with the UniProt *Pseudomonas aeruginosa*  
526 (5584 sequences) the common repository of adventitious proteins (cRAP) v1.0.

527 The R package MSnbase [90] was used for processing proteomics data. Protein differential  
528 abundance was evaluated using the Limma package [91]. Differences in protein abundances  
529 were statistically determined using the Student's *t*-test with variances moderated by Limma's  
530 empirical Bayes method. *P*-values were adjusted for multiple testing by the Benjamini Hochberg  
531 method [92]. Proteins were considered as increased or decreased in abundance, only when  
532 their  $\log_2$  fold change was  $>1$  or  $<-1$ , respectively, and their *p*-value was  $<0.01$ . The mass  
533 spectrometry proteomics data have been deposited to the ProteomeXchange Consortium *via*  
534 the PRIDE (55) partner repository with the data set identifier PXD015615.

## 535 **Construction of Luciferase reporter strains**

536 Translational reporter constructs were made by fusing the upstream promoter sequences with  
537 *luxCDABE* using the primers listed in Table S1. Purified PCR products were digested and  
538 directionally ligated into the multiple cloning site of the pUC18T-mini-Tn7T-lux-Gm plasmid  
539 [14]. The mini-Tn7-lux element were integrated into the PAO1 chromosome by electroporation  
540 along with the helper plasmid pTNS2 as previously described [93].

## 541 **Luciferase-Promoter Assay**

542 Luciferase and OD<sub>600</sub> readings were measured using a BMG Labtech FLUOstar Omega  
543 microplate reader. Strains were cultured in MOPS media with the relevant carbon sources (100  
544 µL) in 96 well microplates (Greiner bio-one, F-Bottom, Black), covered with gas permeable  
545 imaging seals (4titude - 4ti-0516/96). Luciferase expression was assessed every 30 min (Gain =  
546 3600) for up to 24 hr. Growth was assessed by taking OD readings at 600 nm simultaneously  
547 with the luminescence readings Luciferase readings were expressed as relative luminometer  
548 units (RLU) normalised to OD<sub>600</sub> in order to control for growth rate differences across the  
549 selected carbon sources.

## 550 **<sup>13</sup>C fluxomics**

551 Starter cultures were grown in LB medium. For the second and main cultures, PAO1 was grown  
552 in MOPS minimal media with 60 mM acetate or 40 mM glycerol as the sole carbon source (120  
553 mM carbon). For <sup>13</sup>C flux experiments, naturally labelled acetate and glycerol was replaced with  
554 three separate tracers per carbon source to maximise dataset resolution and to accurately  
555 determine substrate uptake. Naturally labelled glycerol was substituted with [1,3-<sup>13</sup>C<sub>2</sub>] glycerol

556 (99%), [2-<sup>13</sup>C] glycerol (99%) and an equimolar mixture of [U-<sup>13</sup>C<sub>3</sub>] glycerol (99%) (Cambridge  
557 Isotope Laboratories, Inc., Andover, MA, USA) and naturally labelled glycerol. Naturally labelled  
558 acetate was substituted with 99% [1-<sup>13</sup>C] sodium acetate, [2-<sup>13</sup>C] sodium acetate or a molar 1:1  
559 mixture of [U-<sup>13</sup>C<sub>2</sub>] sodium acetate obtained from Sigma-Aldrich (Poole, Dorset, UK) and natural  
560 sodium acetate.

561 Starter cultures were prepared by inoculating LB medium with a loop of freshly plated PAO1.  
562 After 6 hr of incubation, 50 µL of cell suspension was transferred to a second culture of MOPS  
563 minimal medium. Subsequently, exponentially growing cells were used as inoculum for main  
564 cultures, and PAO1 was cultured in 25 mL of minimal medium in 250 mL baffled shake flasks  
565 (200 rpm, 37°C) in an orbital shaker (Aquatron, Infors AG, Switzerland). These growth  
566 conditions were selected to ensure sufficient aeration during cultivation. As shown previously  
567 for *P. aeruginosa* PAO1, the oxygen level was maintained above 80% of saturation under  
568 identical growth conditions [21]. In cultures incubated with <sup>13</sup>C-tracer, the inoculum level was  
569 always kept below 1% (initial OD < 0.02) of the final sampled cell concentration to exclude  
570 potential interference of non-labelled inoculum on subsequent calculation of flux [94].

571 Mass isotopomer labelling analysis of proteinogenic amino acids, mass isotopomer labelling  
572 analysis of cell sugar monomers (glucose and glucosamine), metabolic reaction network and  
573 flux calculation were carried out as described in [25].

#### 574 **Quantification of substrates and products**

575 Acetate and glycerol, as well as organic acids (citric acid, α-ketoglutaric acid, gluconic acid, 2-  
576 ketogluconic acid, pyruvic acid, succinic acid, lactic acid, formic acid, fumaric acid) were

577 quantified in filtered culture supernatants (Costar® Spin-X® 0.22  $\mu\text{m}$ ) using isocratic high-  
578 performance liquid chromatography (Agilent 1260 Infinity series, Aminex HPX-87H column at  
579 65°C and a flow rate of 0.5 mL min<sup>-1</sup>) equipped with RI and UV detector (210 nm) with 50 mM  
580 H<sub>2</sub>SO<sub>4</sub> as eluent [95]. Concentrations were determined from commercial standards which were  
581 analysed on the same run. These data were then used to calculate specific uptake and  
582 formation rates and yields for acetate, glycerol and secreted by-products, respectively (File S2).

### 583 **Calculation of redox cofactor and ATP balances**

584 **NADPH, NADH and FADH<sub>2</sub>:** Total production of reduced cofactors was determined by summing  
585 up all cofactor-forming fluxes considering substrate-dependent cofactor specificities [30,96,97].  
586 Anabolic NADPH requirements and anabolically produced NADH were estimated from the  
587 biomass composition [37,98] and measured specific growth rates. Surplus NADPH was  
588 considered to be converted into NADH *via* the activities of a soluble (SthA, PA2991) and a  
589 membrane-bound, proton-translocating (PntAB, PA0195-PA0196) pyridine nucleotide  
590 transhydrogenases [48].

591 **ATP:** Production of ATP *via* substrate-level phosphorylation was calculated by adding all ATP-  
592 producing fluxes and subtracting all ATP-consuming fluxes. Acetate uptake was considered *via*  
593 acetyl-CoA synthase (ACS) consuming 2 mol of ATP per mol acetate catabolized [58]. The ATP  
594 synthesized from NADH and FADH<sub>2</sub> *via* oxidative phosphorylation in the respiratory chain was  
595 estimated assuming a P/O ratio of 1.875 for NADH [48,98,99] and 1.0 for FADH<sub>2</sub> [100],  
596 respectively. The ATP demand was calculated by adding up the requirements for anabolism  
597 estimated from biomass composition, observed specific growth rates, and non-growth

598 associated maintenance (NGAM) needs [48,98,99]. ATP surplus represents available ATP to fulfil  
599 growth-associated maintenance and other cellular ATP-consuming tasks.

#### 600 **NAD(P)(H) extraction**

601 *P. aeruginosa* PAO1 cultures were grown in MOPS media containing a single carbon source (40  
602 mM acetate, 15 mM glucose, 30 mM glycerol, or 30 mM succinate) at 37°C with shaking at 250  
603 rpm, using a culture volume of 150 mL in a 2 L baffled Erlenmeyer flask. For each NAD(P)(H)  
604 extraction, 1.8 mL of culture was removed and immediately added to 7.5 mL ice-cold 100%  
605 methanol followed by centrifugation at  $3220 \times g$  for 14 min at 4°C to obtain a cell pellet. The  
606 pellet was resuspended in 0.2 M HCl for NAD(P)<sup>+</sup> or 0.2 M NaOH for NAD(P)H extraction, before  
607 incubation at 52.5°C for 10 min followed by incubation on ice for 5 min. HCl or NaOH was then  
608 neutralised by the dropwise addition of 0.1 M NaOH or 0.1 M HCl, respectively, whilst vortexing  
609 at low speed. The mixture was then centrifuged for 5 min at  $15,800 \times g$  and 135 µL of the  
610 supernatant was removed for immediate NAD(P)(H) measurement or storage at -80°C. Samples  
611 were stored for a maximum of 1 week before measurement.

#### 612 **NAD(P)(H) measurement**

613 NAD(P)(H) concentrations were measured using an enzyme cycling assay in a 96-well microtiter  
614 plate (Thermo Scientific 167008) as described in [101]. A reagent master mix was prepared  
615 containing 2 volumes 1 M bicine (pH 8.0), 1 volume 100% ethanol, 1 volume 40 mM EDTA (pH  
616 8.0), 1 volume 4.2 mM thiazolyl blue, 2 volumes 16 mM phenazine ethosulfate, and 1 volume  
617 dH<sub>2</sub>O. The reagent mix was incubated at 30°C and primed to injectors in a BMG LABTECH  
618 FLUOstar Omega microplate reader. Aliquots (15 µL) of NAD(P)(H) extracts were added to

619 individual wells of a 96-well microtiter plate, which was then incubated in the microplate  
620 reader at 30°C. Reagent master mix (80  $\mu\text{L}$ ) was added *via* the microplate reader injector (300  
621  $\mu\text{L s}^{-1}$ ) and vigorously mixed (200 rpm, 3 sec) before static incubation for 10 min. Immediately  
622 before measurement, a solution of alcohol dehydrogenase (1 mg  $\text{mL}^{-1}$  in 0.1 M bicine) was  
623 prepared for NAD(H) measurement or glucose 6-phosphate dehydrogenase (0.1 mg  $\text{mL}^{-1}$  in 0.1  
624 M bicine) for NAD(P)(H) measurement and primed to a second injector. To start the reaction  
625 each well was injected (300  $\mu\text{L s}^{-1}$ ) with 5  $\mu\text{L}$  of enzyme solution, followed by vigorous mixing  
626 (200 rpm, 1 sec). The absorbance at 570 nm was then recorded every 30-60 sec for 20 min, with  
627 vigorous shaking (200 rpm, 1 sec) before each read. Slopes from plots of absorbance over time  
628 were calculated for NAD(P)H and NAD(P)<sup>+</sup>, which were then used to calculate ratios.

#### 629 **Colony Forming Unit (CFU) enumeration**

630 Alongside each NAD(P)(H) extraction, an aliquot from the same culture was removed, serial  
631 diluted and plated onto LB agar using the single plate-serial dilution spotting method described  
632 in [102], and colonies were then grown overnight at 37°C.

#### 633 **Western-blot analysis**

634 The cultures were grown aerobically to an  $\text{OD}_{600}$  of 0.5 in MOPS minimal medium  
635 supplemented with the indicated carbon sources. The samples were centrifuged at  $3220 \times g$  for  
636 10 min. Equal amounts of protein were resolved on a 12% SDS—polyacrylamide gel. The  
637 proteins were blotted onto a nitrocellulose membrane, which was blocked with 5% (w/v) dried  
638 skimmed milk in TBS buffer. The membranes were probed with mouse anti-NirS [103] and with

639 a IRDye<sup>®</sup> 680RD and IRDye<sup>®</sup> 800CW Goat anti-mouse IgG secondary antibodies (925-68070).

640 Bands were visualized on an Odyssey Infrared Imaging System (LI-COR Biosciences).

#### 641 **Fluorescence microscopy**

642 Fluorescence microscopy experiments to determine bacteria length were performed on a

643 custom-built microscope based on an Olympus (Center Valley, PA) IX-73 frame with a 100 ×

644 1.49 NA oil objective lens (Olympus UAPON100XOTIRF) and a 488-nm laser (Coherent Sapphire

645 488-300 CW CDRH). Samples were imaged using epi-illumination and images were relayed onto

646 an Andor iXon Ultra 897 camera by a 1.3 × magnification Cairn Twincam image splitter (the

647 second port of the image splitter was not used during these experiments). The resulting pixel

648 width on the sample was measured to be 118 nm. For each field of interest, 100 frames at 100

649 msec exposure time were captured in a 256 × 256 pixel<sup>2</sup> region.

#### 650 **Bacterial size analysis**

651 The micrographs captured for this study exhibited typically one or two bacteria over a 30 mm ×

652 30 mm<sup>2</sup> area. The raw data were segmented and filtered for analysis using a MATLAB script

653 included in the Supplementary Information. The data were first segmented: the MATLAB

654 function `adaptthresh` was used to binarize the data using an adaptive threshold. This was

655 deemed good enough as a segmentation step, since the bacteria were sparsely distributed over

656 a dark background in a single frame. The MATLAB `regionprops` function was used to extract the

657 area, major axis length (length of the major axis of a fitted ellipse to the detected blob shape),

658 eccentricity, and centroid of each segmented blob. A filtering step was implemented to only

659 include detected shapes with major axis lengths between 1.7 and 4.5  $\mu\text{m}$  (14 and 38 pixels),  
660 corresponding to the possible size ranges for the bacteria.

## 661 **Acknowledgements**

662 This work was funded by a grant (BB/M019411/1) awarded to MW from the BBSRC. ST was  
663 supported by a BBSRC DTP studentship. MK and CW acknowledge support by the German  
664 Federal Ministry for Education and Research (BMBF) through the grants “BioNylon” (FKZ  
665 03V0757) and “LignoValue” (FKZ 031B0344A). SKD is currently supported by a Herchel Smith  
666 Postdoctoral Fellowship. Some elements of this work were supported by an EMBO Short Term  
667 Fellowship to SKD (7293-2017). CFK acknowledges funding from the UK Engineering and  
668 Physical Sciences Research Council, EPSRC (grants EP/L015889/1 and EP/H018301/1), the  
669 Wellcome Trust (grants 3-3249/Z/16/Z and 089703/Z/09/Z) and the UK Medical Research  
670 Council, MRC (grants MR/K015850/1 and MR/K02292X/1). PVF is supported by the Gates  
671 Cambridge Trust. We are grateful to Mrs. S. Buchmaier and Dr. G. Layer for providing the anti-  
672 NirS antibodies. pMF230 was a gift from Michael Franklin (Addgene plasmid # 62546 ;  
673 <http://n2t.net/addgene:62546> ; RRID:Addgene\_62546). We thank the Cambridge Centre for  
674 Proteomics, including Dr Mike Deery, Mrs. Renata Feret and Prof. Kathryn Lilley for proteomics  
675 support.

676

677

678



679

680 **References**

- 681 1. Klockgether J, Tümmler B. Recent advances in understanding *Pseudomonas aeruginosa*  
682 as a pathogen. *F1000Research*. 2017;6: 1261. doi:10.12688/f1000research.10506.1
- 683 2. Rajan S, Saiman L. Pulmonary infections in patients with cystic fibrosis. *Semin Respir*  
684 *Infect*. 2002;17: 47–56. Available: <http://www.ncbi.nlm.nih.gov/pubmed/11891518>
- 685 3. Gibson RL, Burns JL, Ramsey BW. Pathophysiology and Management of Pulmonary  
686 Infections in Cystic Fibrosis. *Am J Respir Crit Care Med*. 2003;168: 918–951.  
687 doi:10.1164/rccm.200304-505SO
- 688 4. La Rosa R, Johansen HK, Molin S. Convergent Metabolic Specialization through Distinct  
689 Evolutionary Paths in *Pseudomonas aeruginosa*. *MBio*. American Society for  
690 Microbiology; 2018;9: e00269-18. doi:10.1128/mBio.00269-18
- 691 5. Rojo F. Carbon catabolite repression in *Pseudomonas*: optimizing metabolic versatility  
692 and interactions with the environment. *FEMS Microbiol Rev*. 2010;34: 658–684.  
693 doi:10.1111/j.1574-6976.2010.00218.x
- 694 6. Palmer KL, Aye LM, Whiteley M. Nutritional Cues Control *Pseudomonas aeruginosa*  
695 Multicellular Behavior in Cystic Fibrosis Sputum. *J Bacteriol*. 2007;189: 8079–8087.  
696 doi:10.1128/JB.01138-07
- 697 7. Flynn JM, Niccum D, Dunitz JM, Hunter RC. Evidence and Role for Bacterial Mucin  
698 Degradation in Cystic Fibrosis Airway Disease. Wozniak DJ, editor. *PLOS Pathog*. Public

- 699 Library of Science; 2016;12: e1005846. doi:10.1371/journal.ppat.1005846
- 700 8. Sun Z, Kang Y, Norris MH, Troyer RM, Son MS, Schweizer HP, et al. Blocking  
701 Phosphatidylcholine Utilization in *Pseudomonas aeruginosa*, via Mutagenesis of Fatty  
702 Acid, Glycerol and Choline Degradation Pathways, Confirms the Importance of This  
703 Nutrient Source In Vivo. van Veen HW, editor. PLoS One. Public Library of Science;  
704 2014;9: e103778. doi:10.1371/journal.pone.0103778
- 705 9. Marty N, Dournes JL, Chabanon G, Montrozier H. Influence of nutrient media on the  
706 chemical composition of the exopolysaccharide from mucoid and non-mucoid  
707 *Pseudomonas aeruginosa*. FEMS Microbiol Lett. 1992;77: 35–44. Available:  
708 <http://www.ncbi.nlm.nih.gov/pubmed/1459419>
- 709 10. Kim J, Oliveros JC, Nikel PI, de Lorenzo V, Silva-Rocha R. Transcriptomic fingerprinting of  
710 *Pseudomonas putida* under alternative physiological regimes. Environ Microbiol Rep.  
711 2013;5: 883–891. doi:10.1111/1758-2229.12090
- 712 11. Nikel PI, Romero-Campero FJ, Zeidman JA, Goñi-Moreno Á, de Lorenzo V. The glycerol-  
713 dependent metabolic persistence of *Pseudomonas putida* KT2440 reflects the regulatory  
714 logic of the GlpR repressor. MBio. American Society for Microbiology; 2015;6: e00340-15.  
715 doi:10.1128/mBio.00340-15
- 716 12. Shuman J, Giles TX, Carroll L, Tabata K, Powers A, Suh S-J, et al. Transcriptome analysis of  
717 a *Pseudomonas aeruginosa* sn-glycerol-3-phosphate dehydrogenase mutant reveals a  
718 disruption in bioenergetics. Microbiology. Microbiology Society; 2018;164: 551–562.  
719 doi:10.1099/mic.0.000646

- 720 13. Agrawal S, Jaswal K, Shiver AL, Balecha H, Patra T, Chaba R. A genome-wide screen in  
721 *Escherichia coli* reveals that ubiquinone is a key antioxidant for metabolism of long-chain  
722 fatty acids. J Biol Chem. 2017;292: 20086–20099. doi:10.1074/jbc.M117.806240
- 723 14. Choi K-H, Schweizer HP. mini-Tn7 insertion in bacteria with single attTn7 sites: example  
724 *Pseudomonas aeruginosa*. Nat Protoc. Nature Publishing Group; 2006;1: 153–161.  
725 doi:10.1038/nprot.2006.24
- 726 15. Liebermeister W, Noor E, Flamholz A, Davidi D, Bernhardt J, Milo R. Visual account of  
727 protein investment in cellular functions. Proc Natl Acad Sci U S A. National Academy of  
728 Sciences; 2014;111: 8488–93. doi:10.1073/pnas.1314810111
- 729 16. Beste DJ V, Nöh K, Niedenführ S, Mendum TA, Hawkins ND, Ward JL, et al. <sup>13</sup>C-flux  
730 spectral analysis of host-pathogen metabolism reveals a mixed diet for intracellular  
731 *Mycobacterium tuberculosis*. Chem Biol. Elsevier; 2013;20: 1012–21.  
732 doi:10.1016/j.chembiol.2013.06.012
- 733 17. Eisenreich W, Slaghuis J, Laupitz R, Bussemer J, Stritzker J, Schwarz C, et al. <sup>13</sup>C  
734 isotopologue perturbation studies of *Listeria monocytogenes* carbon metabolism and its  
735 modulation by the virulence regulator PrfA. Proc Natl Acad Sci. 2006;103: 2040–2045.  
736 doi:10.1073/pnas.0507580103
- 737 18. Long CP, Gonzalez JE, Feist AM, Palsson BO, Antoniewicz MR. Dissecting the genetic and  
738 metabolic mechanisms of adaptation to the knockout of a major metabolic enzyme in  
739 *Escherichia coli*. Proc Natl Acad Sci U S A. National Academy of Sciences; 2018;115: 222–  
740 227. doi:10.1073/pnas.1716056115

- 741 19. Lien SK, Niedenführ S, Sletta H, Nöh K, Bruheim P. Fluxome study of *Pseudomonas*  
742 *fluorescens* reveals major reorganisation of carbon flux through central metabolic  
743 pathways in response to inactivation of the anti-sigma factor MucA. *BMC Syst Biol.*  
744 *BioMed Central*; 2015;9: 6. doi:10.1186/s12918-015-0148-0
- 745 20. Lassek C, Berger A, Zühlke D, Wittmann C, Riedel K. Proteome and carbon flux analysis of  
746 *Pseudomonas aeruginosa* clinical isolates from different infection sites. *Proteomics.*  
747 *Wiley-Blackwell*; 2016;16: 1381–1385. doi:10.1002/pmic.201500228
- 748 21. Berger A, Dohnt K, Tielen P, Jahn D, Becker J, Wittmann C. Robustness and plasticity of  
749 metabolic pathway flux among uropathogenic isolates of *Pseudomonas aeruginosa*. Fong  
750 SS, editor. *PLoS One. Public Library of Science*; 2014;9: e88368.  
751 doi:10.1371/journal.pone.0088368
- 752 22. Opperman MJ, Shachar-Hill Y. Metabolic flux analyses of *Pseudomonas aeruginosa* cystic  
753 fibrosis isolates. *Metab Eng. Academic Press*; 2016;38: 251–263.  
754 doi:10.1016/J.YMBEN.2016.09.002
- 755 23. Collier DN, Hager PW, Phibbs P V. Catabolite repression control in the *Pseudomonads*.  
756 *Res Microbiol.* 147: 551–61. Available: <http://www.ncbi.nlm.nih.gov/pubmed/9084769>
- 757 24. Rossi E, Falcone M, Molin S, Johansen HK. High-resolution in situ transcriptomics of  
758 *Pseudomonas aeruginosa* unveils genotype independent patho-phenotypes in cystic  
759 fibrosis lungs. *Nat Commun. Nature Publishing Group*; 2018;9: 3459.  
760 doi:10.1038/s41467-018-05944-5

- 761 25. Kohlstedt M, Wittmann C. GC-MS-based <sup>13</sup>C metabolic flux analysis resolves the parallel  
762 and cyclic glucose metabolism of *Pseudomonas putida* KT2440 and *Pseudomonas*  
763 *aeruginosa* PAO1. *Metab Eng.* 2019;54: 35–53. doi:10.1016/j.ymben.2019.01.008
- 764 26. Schweizer HP, Po C. Regulation of glycerol metabolism in *Pseudomonas aeruginosa*:  
765 characterization of the *glpR* repressor gene. *J Bacteriol. American Society for*  
766 *Microbiology Journals*; 1996;178: 5215–21. doi:10.1128/JB.178.17.5215-5221.1996
- 767 27. Williams SG, Greenwood JA, Jones CW. The effect of nutrient limitation on glycerol  
768 uptake and metabolism in continuous cultures of *Pseudomonas aeruginosa* [Internet].  
769 2019. Available: [www.microbiologyresearch.org](http://www.microbiologyresearch.org)
- 770 28. Poblete-Castro I, Wittmann C, Nikel PI. Biochemistry, genetics and biotechnology of  
771 glycerol utilization in *Pseudomonas* species. *Microb Biotechnol.* 2019; 1751-7915.13400.  
772 doi:10.1111/1751-7915.13400
- 773 29. Conway T. The Entner-Doudoroff pathway: history, physiology and molecular biology.  
774 *FEMS Microbiol Lett.* No longer published by Elsevier; 1992;103: 1–27. doi:10.1016/0378-  
775 1097(92)90334-K
- 776 30. Nikel PI, Chavarría M, Fuhrer T, Sauer U, de Lorenzo V. *Pseudomonas putida* KT2440  
777 Strain Metabolizes Glucose through a Cycle Formed by Enzymes of the Entner-Doudoroff,  
778 Embden-Meyerhof-Parnas, and Pentose Phosphate Pathways. *J Biol Chem. American*  
779 *Society for Biochemistry and Molecular Biology*; 2015;290: 25920–32.  
780 doi:10.1074/jbc.M115.687749

- 781 31. Heath, H. E., Elizabeth GT. Relationship Between Catabolism of Glycerol and Metabolism  
782 of Hexosephosphate Derivatives by *Pseudomonas aeruginosa* [Internet]. JOURNAL OF  
783 BACTERIOLOGY. 1978. Available: <http://jb.asm.org/>
- 784 32. Diaz-Perez AL, Roman-Doval C, Diaz-Perez C, Cervantes C, Sosa-Aguirre CR, Lopez-Meza  
785 JE, et al. Identification of the *aceA* gene encoding isocitrate lyase required for the growth  
786 of *Pseudomonas aeruginosa* on acetate, acyclic terpenes and leucine. FEMS Microbiol  
787 Lett. 2007;269: 309–316. doi:10.1111/j.1574-6968.2007.00654.x
- 788 33. McVey AC, Medarametla P, Chee X, Bartlett S, Poso A, Spring DR, et al. Structural and  
789 Functional Characterization of Malate Synthase G from Opportunistic Pathogen  
790 *Pseudomonas aeruginosa*. Biochemistry. American Chemical Society; 2017;56: 5539–  
791 5549. doi:10.1021/acs.biochem.7b00852
- 792 34. Jacob K, Rasmussen A, Tyler P, Servos MM, Sylla M, Prado C, et al. Regulation of acetyl-  
793 CoA synthetase transcription by the CrbS/R two-component system is conserved in  
794 genetically diverse environmental pathogens. PLoS One. Public Library of Science;  
795 2017;12: e0177825. doi:10.1371/journal.pone.0177825
- 796 35. Görisch H, Jeoung J-H, Rückert A, Kretzschmar U. Malate:quinone oxidoreductase is  
797 essential for growth on ethanol or acetate in *Pseudomonas aeruginosa*. Microbiology.  
798 2002;148: 3839–3847. doi:10.1099/00221287-148-12-3839
- 799 36. Crousilles A, Dolan SK, Brear P, Chirgadze DY, Welch M. Gluconeogenic precursor  
800 availability regulates flux through the glyoxylate shunt in *Pseudomonas aeruginosa*. J Biol  
801 Chem. American Society for Biochemistry and Molecular Biology; 2018;293: 14260–

802 14269. doi:10.1074/jbc.RA118.004514

803 37. Berger A, Dohnt K, Tielen P, Jahn D, Becker J, Wittmann C. Robustness and Plasticity of

804 Metabolic Pathway Flux among Uropathogenic Isolates of *Pseudomonas aeruginosa*.

805 Fong SS, editor. PLoS One. Public Library of Science; 2014;9: e88368.

806 doi:10.1371/journal.pone.0088368

807 38. Singh R, Mailloux RJ, Puiseux-Dao S, Appanna VD. Oxidative stress evokes a metabolic

808 adaptation that favors increased NADPH synthesis and decreased NADH production in

809 *Pseudomonas fluorescens*. J Bacteriol. 2007;189: 6665–6675. doi:10.1128/JB.00555-07

810 39. Arai H, Kawakami T, Osamura T, Hirai T, Sakai Y, Ishii M. Enzymatic characterization and

811 in vivo function of five terminal oxidases in *Pseudomonas aeruginosa*. J Bacteriol.

812 American Society for Microbiology Journals; 2014;196: 4206–15. doi:10.1128/JB.02176-

813 14

814 40. Dietrich LEP, Okegbe C, Price-Whelan A, Sakhtah H, Hunter RC, Newman DK. Bacterial

815 community morphogenesis is intimately linked to the intracellular redox state. J

816 Bacteriol. American Society for Microbiology Journals; 2013;195: 1371–80.

817 doi:10.1128/JB.02273-12

818 41. Poole RK, Cook GM. Redundancy of aerobic respiratory chains in bacteria? Routes,

819 reasons and regulation. Adv Microb Physiol. 2000;43: 165–224. Available:

820 <http://www.ncbi.nlm.nih.gov/pubmed/10907557>

821 42. Raba DA, Rosas-Lemus M, Menzer WM, Li C, Fang X, Liang P, et al. Characterization of the

- 822 Pseudomonas aeruginosa NQR Complex, a Bacterial Proton Pump with Roles in  
823 Autopoisoning Resistance. J Biol Chem. American Society for Biochemistry and Molecular  
824 Biology; 2018; jbc.RA118.003194. doi:10.1074/jbc.RA118.003194
- 825 43. Arai H. Regulation and Function of Versatile Aerobic and Anaerobic Respiratory  
826 Metabolism in Pseudomonas aeruginosa. Front Microbiol. Frontiers Media SA; 2011;2:  
827 103. doi:10.3389/fmicb.2011.00103
- 828 44. Comolli JC, Donohue TJ. Differences in two Pseudomonas aeruginosa cbb3 cytochrome  
829 oxidases. Mol Microbiol. Wiley/Blackwell (10.1111); 2004;51: 1193–1203.  
830 doi:10.1046/j.1365-2958.2003.03904.x
- 831 45. Le Laz S, kpebe A, Bauzan M, Lignon S, Rousset M, Brugna M. Expression of terminal  
832 oxidases under nutrient-starved conditions in Shewanella oneidensis: detection of the A-  
833 type cytochrome c oxidase. Sci Rep. Nature Publishing Group; 2016;6: 19726.  
834 doi:10.1038/srep19726
- 835 46. Osamura T, Kawakami T, Kido R, Ishii M, Arai H. Specific expression and function of the A-  
836 type cytochrome c oxidase under starvation conditions in Pseudomonas aeruginosa. PLoS  
837 One. Public Library of Science; 2017;12: e0177957. doi:10.1371/journal.pone.0177957
- 838 47. Kawakami T, Kuroki M, Ishii M, Igarashi Y, Arai H. Differential expression of multiple  
839 terminal oxidases for aerobic respiration in *Pseudomonas aeruginosa*. Environ Microbiol.  
840 Wiley/Blackwell (10.1111); 2009;12: 1399–1412. doi:10.1111/j.1462-2920.2009.02109.x
- 841 48. Nikel PI, Pérez-Pantoja D, de Lorenzo V. Pyridine nucleotide transhydrogenases enable



- 842 redox balance of *Pseudomonas putida* during biodegradation of aromatic compounds.  
843 Environ Microbiol. Wiley/Blackwell (10.1111); 2016;18: 3565–3582. doi:10.1111/1462-  
844 2920.13434
- 845 49. Sauer U, Canonaco F, Heri S, Perrenoud A, Fischer E. The Soluble and Membrane-bound  
846 Transhydrogenases UdhA and PntAB Have Divergent Functions in NADPH Metabolism of  
847 *Escherichia coli*. J Biol Chem. 2004;279: 6613–6619. doi:10.1074/jbc.M311657200
- 848 50. Szenk M, Dill KA, de Graff AMR. Why Do Fast-Growing Bacteria Enter Overflow  
849 Metabolism? Testing the Membrane Real Estate Hypothesis. Cell Syst. 2017;5: 95–104.  
850 doi:10.1016/j.cels.2017.06.005
- 851 51. Nivens DE, Ohman DE, Williams J, Franklin MJ. Role of Alginate and Its O Acetylation in  
852 Formation of *Pseudomonas aeruginosa* Microcolonies and Biofilms. J Bacteriol. 2001;183:  
853 1047–1057. doi:10.1128/JB.183.3.1047-1057.2001
- 854 52. Deforet M, van Ditmarsch D, Xavier JB. Cell-Size Homeostasis and the Incremental Rule in  
855 a Bacterial Pathogen. Biophys J. The Biophysical Society; 2015;109: 521–8.  
856 doi:10.1016/j.bpj.2015.07.002
- 857 53. Borrero-de Acuña JM, Rohde M, Wissing J, Jänsch L, Schobert M, Molinari G, et al.  
858 Protein Network of the *Pseudomonas aeruginosa* Denitrification Apparatus. J Bacteriol.  
859 American Society for Microbiology Journals; 2016;198: 1401–13. doi:10.1128/JB.00055-  
860 16
- 861 54. Line L, Alhede M, Kolpen M, Kähler M, Ciofu O, Bjarnsholt T, et al. Physiological levels of

- 862 nitrate support anoxic growth by denitrification of *Pseudomonas aeruginosa* at growth  
863 rates reported in cystic fibrosis lungs and sputum. *Front Microbiol. Frontiers*; 2014;5:  
864 554. doi:10.3389/fmicb.2014.00554
- 865 55. Worlitzsch D, Tarran R, Ulrich M, Schwab U, Cekici A, Meyer KC, et al. Effects of reduced  
866 mucus oxygen concentration in airway *Pseudomonas* infections of cystic fibrosis patients.  
867 *J Clin Invest. American Society for Clinical Investigation*; 2002;109: 317.  
868 doi:10.1172/JCI13870
- 869 56. Palmer KL, Brown SA, Whiteley M. Membrane-bound nitrate reductase is required for  
870 anaerobic growth in cystic fibrosis sputum. *J Bacteriol. American Society for Microbiology*  
871 *Journals*; 2007;189: 4449–55. doi:10.1128/JB.00162-07
- 872 57. Chen J, Strous M. Denitrification and aerobic respiration, hybrid electron transport chains  
873 and co-evolution. *Biochim Biophys Acta - Bioenerg. Elsevier*; 2013;1827: 136–144.  
874 doi:10.1016/J.BBABI.2012.10.002
- 875 58. Görisch H, Kretzschmar U, Schobert M. The *Pseudomonas aeruginosa* *acsA* gene,  
876 encoding an acetyl-CoA synthetase, is essential for growth on ethanol. *Microbiology*.  
877 2001;147: 2671–2677. doi:10.1099/00221287-147-10-2671
- 878 59. Vemuri GN, Eiteman MA, McEwen JE, Olsson L, Nielsen J. Increasing NADH oxidation  
879 reduces overflow metabolism in *Saccharomyces cerevisiae*. *Proc Natl Acad Sci U S A*.  
880 *National Academy of Sciences*; 2007;104: 2402–7. doi:10.1073/pnas.0607469104
- 881 60. Dietrich LEP, Okegbe C, Price-Whelan A, Sakhtah H, Hunter RC, Newman DK. Bacterial

- 882 community morphogenesis is intimately linked to the intracellular redox state. J  
883 Bacteriol. American Society for Microbiology Journals; 2013;195: 1371–80.  
884 doi:10.1128/JB.02273-12
- 885 61. Ishii N, Nakahigashi K, Baba T, Robert M, Soga T, Kanai A, et al. Multiple High-Throughput  
886 Analyses Monitor the Response of *E. coli* to Perturbations. *Science* (80- ). 2007;316: 593–  
887 597. doi:10.1126/science.1132067
- 888 62. Buschke N, Becker J, Schäfer R, Kiefer P, Biedendieck R, Wittmann C. Systems metabolic  
889 engineering of xylose-utilizing *Corynebacterium glutamicum* for production of 1,5-  
890 diaminopentane. *Biotechnol J.* 2013;8: 557–570. doi:10.1002/biot.201200367
- 891 63. Kohlstedt M, Sappa PK, Meyer H, Maaß S, Zapras A, Hoffmann T, et al. Adaptation of *B*  
892 *acillus subtilis* carbon core metabolism to simultaneous nutrient limitation and osmotic  
893 challenge: a multi-omics perspective. *Environ Microbiol.* 2014;16: 1898–1917.  
894 doi:10.1111/1462-2920.12438
- 895 64. Moxley JF, Jewett MC, Antoniewicz MR, Villas-Boas SG, Alper H, Wheeler RT, et al. Linking  
896 high-resolution metabolic flux phenotypes and transcriptional regulation in yeast  
897 modulated by the global regulator Gcn4p. *Proc Natl Acad Sci.* 2009;106: 6477–6482.  
898 doi:10.1073/pnas.0811091106
- 899 65. Lange A, Becker J, Schulze D, Cahoreau E, Portais J-C, Haefner S, et al. Bio-based  
900 succinate from sucrose: High-resolution <sup>13</sup>C metabolic flux analysis and metabolic  
901 engineering of the rumen bacterium *Basfia succiniciproducens*. *Metab Eng.* 2017;44:  
902 198–212. doi:10.1016/j.ymben.2017.10.003

- 903 66. Kukurugya MA, Mendonca CM, Solhtalab M, Wilkes RA, Thannhauser TW, Aristilde L.  
904 Multi-omics analysis unravels a segregated metabolic flux network that tunes co-  
905 utilization of sugar and aromatic carbons in *Pseudomonas putida*. *J Biol Chem. American*  
906 *Society for Biochemistry and Molecular Biology*; 2019;294: 8464–8479.  
907 doi:10.1074/jbc.RA119.007885
- 908 67. Fuhrer T, Fischer E, Sauer U. Experimental identification and quantification of glucose  
909 metabolism in seven bacterial species. *J Bacteriol. American Society for Microbiology*  
910 *Journals*; 2005;187: 1581–90. doi:10.1128/JB.187.5.1581-1590.2005
- 911 68. Kwon T, Huse HK, Vogel C, Whiteley M, Marcotte EM. Protein-to-mRNA ratios are  
912 conserved between *Pseudomonas aeruginosa* strains. *J Proteome Res. American*  
913 *Chemical Society*; 2014;13: 2370–80. doi:10.1021/pr4011684
- 914 69. Nikel PI, Kim J, de Lorenzo V. Metabolic and regulatory rearrangements underlying  
915 glycerol metabolism in *Pseudomonas putida* KT2440. *Environ Microbiol. John Wiley &*  
916 *Sons, Ltd* (10.1111); 2014;16: 239–254. doi:10.1111/1462-2920.12224
- 917 70. Cattoir V, Narasimhan G, Skurnik D, Aschard H, Roux D, Ramphal R, et al. Transcriptional  
918 response of mucoid *Pseudomonas aeruginosa* to human respiratory mucus. *MBio.*  
919 *American Society for Microbiology (ASM)*; 2013;3: e00410-12. doi:10.1128/mBio.00410-  
920 12
- 921 71. Wu J, Bauer CE. RegB kinase activity is controlled in part by monitoring the ratio of  
922 oxidized to reduced ubiquinones in the ubiquinone pool. *MBio. American Society for*  
923 *Microbiology*; 2010;1: e00272-10. doi:10.1128/mBio.00272-10

- 924 72. Price-Whelan A, Dietrich LEP, Newman DK. Pyocyanin alters redox homeostasis and  
925 carbon flux through central metabolic pathways in *Pseudomonas aeruginosa* PA14. J  
926 Bacteriol. American Society for Microbiology Journals; 2007;189: 6372–81.  
927 doi:10.1128/JB.00505-07
- 928 73. Lin Y-C, Sekedat MD, Cornell WC, Silva GM, Okegbe C, Price-Whelan A, et al. Phenazines  
929 Regulate Nap-Dependent Denitrification in *Pseudomonas aeruginosa* Biofilms. J  
930 Bacteriol. American Society for Microbiology Journals; 2018;200: e00031-18.  
931 doi:10.1128/JB.00031-18
- 932 74. Lycus P, Soriano-Laguna MJ, Kjos M, Richardson DJ, Gates AJ, Milligan DA, et al. A bet-  
933 hedging strategy for denitrifying bacteria curtails their release of N<sub>2</sub>O. Proc Natl Acad Sci  
934 U S A. National Academy of Sciences; 2018;115: 11820–11825.  
935 doi:10.1073/pnas.1805000115
- 936 75. Alvarez-Ortega C, Harwood CS. Responses of *Pseudomonas aeruginosa* to low oxygen  
937 indicate that growth in the cystic fibrosis lung is by aerobic respiration. Mol Microbiol.  
938 Wiley/Blackwell (10.1111); 2007;65: 153–165. doi:10.1111/j.1365-2958.2007.05772.x
- 939 76. Chen J, Strous M. Denitrification and aerobic respiration, hybrid electron transport chains  
940 and co-evolution. Biochim Biophys Acta - Bioenerg. Elsevier; 2013;1827: 136–144.  
941 doi:10.1016/J.BBABI.2012.10.002
- 942 77. Son MS, Matthews WJ, Kang Y, Nguyen DT, Hoang TT. In vivo evidence of *Pseudomonas*  
943 *aeruginosa* nutrient acquisition and pathogenesis in the lungs of cystic fibrosis patients.  
944 Infect Immun. 2007;75: 5313–5324. doi:10.1128/IAI.01807-06

- 945 78. Rossi E, Falcone M, Molin S, Johansen HK. High-resolution in situ transcriptomics of  
946 *Pseudomonas aeruginosa* unveils genotype independent patho-phenotypes in cystic  
947 fibrosis lungs. *Nat Commun.* Nature Publishing Group; 2018;9: 3459.  
948 doi:10.1038/s41467-018-05944-5
- 949 79. Cornforth DM, Dees JL, Ibberson CB, Huse HK, Mathiesen IH, Kirketerp-Møller K, et al.  
950 *Pseudomonas aeruginosa* transcriptome during human infection. *Proc Natl Acad Sci.*  
951 2018;115: E5125–E5134. doi:10.1073/pnas.1717525115
- 952 80. Jackson AA, Daniels EF, Hammond JH, Willger SD, Hogan DA. Global regulator Anr  
953 represses PlcH phospholipase activity in *Pseudomonas aeruginosa* when oxygen is  
954 limiting. *Microbiology.* Microbiology Society; 2014;160: 2215–25.  
955 doi:10.1099/mic.0.081158-0
- 956 81. Dötsch A, Eckweiler D, Schniederjans M, Zimmermann A, Jensen V, Scharfe M, et al. The  
957 *Pseudomonas aeruginosa* Transcriptome in Planktonic Cultures and Static Biofilms Using  
958 RNA Sequencing. Semsey S, editor. *PLoS One.* Public Library of Science; 2012;7: e31092.  
959 doi:10.1371/journal.pone.0031092
- 960 82. Vemuri GN, Altman E, Sangurdekar DP, Khodursky AB, Eiteman MA. Overflow  
961 metabolism in *Escherichia coli* during steady-state growth: transcriptional regulation and  
962 effect of the redox ratio. *Appl Environ Microbiol.* American Society for Microbiology  
963 (ASM); 2006;72: 3653–61. doi:10.1128/AEM.72.5.3653-3661.2006
- 964 83. Basan M, Hui S, Okano H, Zhang Z, Shen Y, Williamson JR, et al. Overflow metabolism in  
965 *Escherichia coli* results from efficient proteome allocation. *Nature.* Nature Publishing

- 966 Group; 2015;528: 99–104. doi:10.1038/nature15765
- 967 84. Stover CK, Pham XQ, Erwin AL, Mizoguchi SD, Warrener P, Hickey MJ, et al. Complete  
968 genome sequence of *Pseudomonas aeruginosa* PAO1, an opportunistic pathogen.  
969 Nature. Nature Publishing Group; 2000;406: 959–964. doi:10.1038/35023079
- 970 85. LaBauve AE, Wargo MJ. Growth and laboratory maintenance of *Pseudomonas*  
971 *aeruginosa*. Curr Protoc Microbiol. NIH Public Access; 2012;Chapter 6: Unit 6E.1.  
972 doi:10.1002/9780471729259.mc06e01s25
- 973 86. Tata M, Wolfinger MT, Amman F, Roschanski N, Dötsch A, Sonnleitner E, et al. RNASeq  
974 Based Transcriptional Profiling of *Pseudomonas aeruginosa* PA14 after Short- and Long-  
975 Term Anoxic Cultivation in Synthetic Cystic Fibrosis Sputum Medium. Roop RM, editor.  
976 PLoS One. Public Library of Science; 2016;11: e0147811.  
977 doi:10.1371/journal.pone.0147811
- 978 87. Bolger AM, Lohse M, Usadel B. Trimmomatic: a flexible trimmer for Illumina sequence  
979 data. Bioinformatics. 2014;30: 2114–2120. doi:10.1093/bioinformatics/btu170
- 980 88. Trapnell C, Roberts A, Goff L, Pertea G, Kim D, Kelley DR, et al. Differential gene and  
981 transcript expression analysis of RNA-seq experiments with TopHat and Cufflinks. Nat  
982 Protoc. NIH Public Access; 2012;7: 562–78. doi:10.1038/nprot.2012.016
- 983 89. McAlister GC, Nusinow DP, Jedrychowski MP, Wühr M, Huttlin EL, Erickson BK, et al.  
984 MultiNotch MS3 Enables Accurate, Sensitive, and Multiplexed Detection of Differential  
985 Expression across Cancer Cell Line Proteomes. Anal Chem. American Chemical Society;

- 986 2014;86: 7150–7158. doi:10.1021/ac502040v
- 987 90. Gatto L, Lilley KS. MSnbase-an R/Bioconductor package for isobaric tagged mass  
988 spectrometry data visualization, processing and quantitation. *Bioinformatics*. 2012;28:  
989 288–289. doi:10.1093/bioinformatics/btr645
- 990 91. Smyth GK. *limma: Linear Models for Microarray Data*. *Bioinformatics and Computational  
991 Biology Solutions Using R and Bioconductor*. New York: Springer-Verlag; 2005. pp. 397–  
992 420. doi:10.1007/0-387-29362-0\_23
- 993 92. Benjamini Y, Hochberg Y. Controlling the False Discovery Rate: A Practical and Powerful  
994 Approach to Multiple Testing [Internet]. *Journal of the Royal Statistical Society. Series B  
995 (Methodological)*. WileyRoyal Statistical Society; 1995. pp. 289–300.  
996 doi:10.2307/2346101
- 997 93. Heath Damron F, McKenney ES, Barbier M, Liechti GW, Goldberg JB. Construction of  
998 Mobilizable Mini-Tn7 Vectors for Bioluminescent Detection and Single Copy Promoter lux  
999 Reporter Analysis in Gram-Negative Bacteria. *CAMBRIDGE Univ Libr*. 2013;  
1000 doi:10.1128/AEM.00640-13
- 1001 94. Wittmann C. Fluxome analysis using GC-MS. *Microb Cell Fact*. *BioMed Central*; 2007;6: 6.  
1002 doi:10.1186/1475-2859-6-6
- 1003 95. Kind S, Becker J, Wittmann C. Increased lysine production by flux coupling of the  
1004 tricarboxylic acid cycle and the lysine biosynthetic pathway—Metabolic engineering of  
1005 the availability of succinyl-CoA in *Corynebacterium glutamicum*. *Metab Eng*. 2013;15:



- 1006 184–195. doi:10.1016/j.ymben.2012.07.005
- 1007 96. Görisch H, Jeoung J-H, Rückert A, Kretzschmar U. Malate:quinone oxidoreductase is  
1008 essential for growth on ethanol or acetate in *Pseudomonas aeruginosa*. *Microbiology*.  
1009 2002;148: 3839–3847. doi:10.1099/00221287-148-12-3839
- 1010 97. Rivers DB, Blevins WT. Multiple Enzyme Forms of Glyceraldehyde-3-phosphate  
1011 Dehydrogenase in *Pseudomonas aeruginosa* PAO. *Microbiology*. 1987;133: 3159–3164.  
1012 doi:10.1099/00221287-133-11-3159
- 1013 98. Bartell JA, Blazier AS, Yen P, Thøgersen JC, Jelsbak L, Goldberg JB, et al. Reconstruction of  
1014 the metabolic network of *Pseudomonas aeruginosa* to interrogate virulence factor  
1015 synthesis. *Nat Commun*. Nature Publishing Group; 2017;8: 14631.  
1016 doi:10.1038/ncomms14631
- 1017 99. Oberhardt MA, Puchałka J, Martins dos Santos VAP, Papin JA. Reconciliation of Genome-  
1018 Scale Metabolic Reconstructions for Comparative Systems Analysis. Bourne PE, editor.  
1019 *PLoS Comput Biol*. 2011;7: e1001116. doi:10.1371/journal.pcbi.1001116
- 1020 100. Yuan Q, Huang T, Li P, Hao T, Li F, Ma H, et al. Pathway-Consensus Approach to Metabolic  
1021 Network Reconstruction for *Pseudomonas putida* KT2440 by Systematic Comparison of  
1022 Published Models. Virolle M-J, editor. *PLoS One*. Public Library of Science; 2017;12:  
1023 e0169437. doi:10.1371/journal.pone.0169437
- 1024 101. Kern SE, Price-Whelan A, Newman DK. Extraction and Measurement of NAD(P)<sup>+</sup> and  
1025 NAD(P)H. 2014. pp. 311–323. doi:10.1007/978-1-4939-0473-0\_26

- 1026 102. Thomas P, Sekhar AC, Upreti R, Mujawar MM, Pasha SS. Optimization of single plate-  
1027 serial dilution spotting (SP-SDS) with sample anchoring as an assured method for  
1028 bacterial and yeast cfu enumeration and single colony isolation from diverse samples.  
1029 Biotechnol Reports. 2015;8: 45–55. doi:10.1016/j.btre.2015.08.003
- 1030 103. Nicke T, Schnitzer T, Münch K, Adamczack J, Haufschildt K, Buchmeier S, et al. Maturation  
1031 of the cytochrome cd1 nitrite reductase NirS from *Pseudomonas aeruginosa* requires  
1032 transient interactions between the three proteins NirS, NirN and NirF. Biosci Rep.  
1033 Portland Press Ltd; 2013;33. doi:10.1042/BSR20130043
- 1034 104. Hoang TT, Karkhoff-Schweizer RR, Kutchma AJ, Schweizer HP. A broad-host-range Flp-FRT  
1035 recombination system for site-specific excision of chromosomally-located DNA  
1036 sequences: application for isolation of unmarked *Pseudomonas aeruginosa* mutants.  
1037 Gene. 1998;212: 77–86. Available: <http://www.ncbi.nlm.nih.gov/pubmed/9661666>  
1038  
1039  
1040  
1041  
1042  
1043  
1044

1045

1046

## 1047 **Figure Legends**

### 1048 **Figure 1; Biochemical pathways involved in central carbon catabolism in *P. aeruginosa* PAO1.**

1049 The metabolic network was constructed around six main metabolic blocks, identified with  
1050 different colours: (i) the peripheral pathways, that encompass the oxidative transformation of  
1051 glucose, acetate and glycerol (orange); (ii) the Embden-Meyerhoff-Parnas pathway (EMP, non-  
1052 functional in *P. aeruginosa* due to the absence of 6-phosphofructo-1-kinase, purple); (iii) the  
1053 pentose phosphate pathway (PPP, red); (iv) the Entner-Doudoroff pathway (EDP, green); (v) the  
1054 tricarboxylic acid cycle and glyoxylate shunt (blue); and (vi) anaplerotic and gluconeogenic  
1055 bioreactions (grey). Figure adapted from [30].

### 1056 **Figure 2; Comparison between protein and transcript fold-changes for selected *P. aeruginosa***

1057 **enzymes involved in central carbon metabolism.** The figure shows the  $\log_2$  fold-changes in  
1058 protein and transcript levels in (i) the peripheral pathways, that encompass the oxidative  
1059 transformation of glucose, acetate and glycerol and the corresponding phosphorylated  
1060 derivatives of these metabolites (orange); (ii) EMP pathway (non-functional, due to the absence  
1061 of a 6-phosphofructo-1-kinase activity) (purple); (iii) the pentose phosphate (PP) pathway (red);  
1062 (iv) the upper ED pathway (green); (v) the tricarboxylic acid cycle and glyoxylate shunt (blue);  
1063 and (vi) anaplerotic and gluconeogenic bioreactions (grey). RNA-Seq and proteomic data are  
1064 shown in File S1. Correlation plots are shown in File S3.

1065 **Figure 3: Growth on different carbon sources primarily affects metabolism.** Illustration of the  
1066 statistically significant changes ( $p$ -value  $\leq 0.01$ , fold change  $\geq 1$  or  $\leq -1$ ) during growth on glycerol  
1067 and acetate as Voronoi tree maps using the proteomaps web service [15] Most of the  
1068 proteomic changes were centred around 'metabolism', notably 'central carbon metabolism',  
1069 'biosynthesis', 'signalling and cellular process' and 'energy metabolism'). Pathway assignment  
1070 was performed using the Kyoto Encyclopedia of Genes and Genomes (KEGG) data set.  
1071 Proteome alterations which could not be assigned to a specific pathway  
1072 (uncharacterised/hypothetical proteins) are illustrated as 'Not Mapped'.

1073 **Figure 4; *In vivo* carbon flux distributions in central metabolism of *P. aeruginosa* PAO1 during**  
1074 **growth on glycerol (A) or acetate (B) as sole carbon sources.** Flux is expressed as a molar  
1075 percentage of the average glycerol ( $9.2 \text{ mmol g}^{-1} \text{ h}^{-1}$ ) or acetate ( $30.4 \text{ mmol g}^{-1} \text{ h}^{-1}$ ) uptake  
1076 rate, calculated from the individual rates in File S2. Anabolic pathways from 11 precursors  
1077 to biomass are indicated as filled blue triangles. The flux distributions with bidirectional  
1078 resolution (i.e., net and exchange fluxes), including the drain from metabolic intermediates to  
1079 biomass and confidence intervals of the flux estimates, are provided in File S2. In agreement  
1080 with previous studies of flux in *P. aeruginosa* and *Pseudomonas fluorescens*, we found no  
1081 evidence for significant metabolite export during exponential growth in minimal media  
1082 [19,21,22]. The errors given for each flux reflect the corresponding 90% confidence intervals.  
1083 The full flux data sets are presented in Supporting Information File S2. Colours qualitatively  
1084 indicate fluxomic correlation with changes on the protein/transcript level during growth in  
1085 acetate (light green or red  $\rightarrow$  significant up- or down-regulation (respectively); dark green or  
1086 red  $\rightarrow$  less significant up- or down-regulation).

1087 **Figure 5; Quantitative analysis of NADPH supply and demand (redox) for glycerol (A) and**  
1088 **acetate (B) grown *P. aeruginosa*.** ATP (energy metabolism) supply and demand for glycerol (A)  
1089 and acetate (B) grown *P. aeruginosa*. 6). Reactions linked to NADPH (A-B) and ATP (C-D)  
1090 metabolism were calculated from the obtained fluxes (Fig. 4). They are given as absolute fluxes  
1091 ( $\text{mmol g}^{-1} \text{h}^{-1}$ ) and are related to the specific carbon uptake rate (see File S2). G6PDH; glucose  
1092 6-phosphate dehydrogenase, MAE; malic enzyme, ICDH; isocitrate dehydrogenase, Ox-P;  
1093 oxidative phosphorylation, NGAM; non-growth associated maintenance needs.

1094 **Figure 6; Maximal measured NADH:NAD<sup>+</sup> and NADPH:NADP<sup>+</sup> ratios in *P. aeruginosa* grown in**  
1095 **the indicated sole carbon sources.** Exponentially-growing cells in MOPS-glycerol have a  
1096 significantly lower NADH:NAD<sup>+</sup> ratio ( $p < 0.01$ ) compared with cells grown in MOPS-acetate,  
1097 MOPS-glucose or MOPS-succinate, and a significantly lower NADPH:NADP<sup>+</sup> ratio compared with  
1098 cells grown in MOPS-glucose ( $p = 0.0064$ ). Total NAD(P)(H) concentrations at each time-point  
1099 and in each carbon source are shown in Figures S2 and S4. The data were analysed using  
1100 GraphPad Prism (v 6.01) using t-test statistical analysis (MOPS-glycerol *versus* MOPS-acetate,  
1101 MOPS-glucose or MOPS-succinate).

1102 **Figure 7; Coenzyme re-oxidation is impaired in a *dnr* mutant.** The NADH:NAD<sup>+</sup> (A and B) and  
1103 NADPH:NADP<sup>+</sup> (C and D) ratios were measured in cultures of wild-type PAO1 (A and C) and in  
1104 cultures of an isogenic  $\Delta dnr$  mutant (B and D). Cultures were grown in MOPS-acetate -/+ 20 mM  
1105 KNO<sub>3</sub>, as indicated. Corresponding CFUs are shown in Figure S4. The data were analysed using  
1106 GraphPad Prism (v 6.01) using t-test statistical analysis at 5h growth. Nitrate addition to PAO1  
1107 wild-type resulted in a significant reduction in the NADH:NAD<sup>+</sup> ratio ( $p = 0.0017$ , indicated by

1108 \*\*) and the NADPH:NADP<sup>+</sup> ratio ( $p = 0.0202$ , indicated by \*). Nitrate addition to a  $\Delta dnr$  mutant  
1109 did not significantly alter either ratio ( $p = 0.8065$ ,  $p = 0.1862$ ).

1110 **Figure S1;** Transcriptomic analysis (CummeRbund) and proteomic analysis (LIMMA Package) of  
1111 MOPS-acetate *versus* MOPS-glycerol grown *P. aeruginosa*. A; Principal component analysis  
1112 (PCAplot) of RNA-seq data. BS; Scatterplot matrix of gene and isoform level expression  
1113 (csScatterMatrix). C; A scatter plot comparing the FPKM values from the two conditions  
1114 (csScatter). E; Heatmap and hierarchical clustering of proteomic data. F; Principal component  
1115 analysis of proteomic data. G; Pairwise comparison of proteomic data.

1116 **Figure S2;** NADH:NAD<sup>+</sup> ratios alongside colony forming units (CFUs) from cells grown in MOPS  
1117 A; Acetate, B; Glycerol, C: Glucose, D; Succinate. NADPH:NADP<sup>+</sup> ratios alongside colony forming  
1118 units (CFUs) from cells grown in MOPS E; Acetate, F; Glycerol, G: Glucose, H; Succinate. Total  
1119 NADP(H) concentrations detected over multiple time points from cells grown in MOPS I;  
1120 Acetate, J; Glycerol, K: Glucose, L: Succinate. Total NAD(H) concentrations detected over  
1121 multiple time points from cells grown in MOPS M; Acetate, N; Glycerol, O: Glucose, P:  
1122 Succinate. Three biological replicates per time-point.

1123 **Figure S3;** Luciferase detection in *P. aeruginosa* PAO1 wild-type carrying chromosomal  
1124 promoter: *lux* fusions for the above promoter regions, grown on various carbon sources, MOPS-  
1125 acetate, MOPS-glucose, MOPS-glycerol, MOPS-succinate. A; *aceA*, B; *glcB*, C; *cco1*, D; *cco2*, E;  
1126 *cox*, F; *cyo*, G; *glpD*, H; *nir*. Values normalised to OD<sub>600</sub> (RLU/OD<sub>600</sub>). Three biological replicates  
1127 per sample. Data analysed in GraphPad Prism (V 6.01) using t-test statistical analysis (MOPS  
1128 glycerol *versus* acetate, glucose or succinate).

1129 **Figure S4;** A; Colony forming units (CFUs) B; NAD(H) concentrations, and C: NADP(H)  
1130 concentrations extracted from PAO1 wild-type grown in MOPS-acetate +/- 20 mM KNO<sub>3</sub>. Three  
1131 biological replicates per time-point. D; Colony forming units (CFUs) E; NAD(H) concentrations, and F:  
1132 NADP(H) concentrations extracted from PAO1 WT and  $\Delta dnr$  cells grown cells grown in MOPS-acetate +/-  
1133 20 mM KNO<sub>3</sub>. Three biological replicates per time-point.

1134 **Figure S5;** Western blot showing; (A) Expression of the Anr/Dnr-regulated denitrification  
1135 enzyme NirS during exponential growth of *P. aeruginosa* in MOPS-glucose, MOPS-succinate and  
1136 MOPS-acetate. NirS is not expressed in a  $\Delta anr$  or  $\Delta dnr$  mutant. The isocitrate dehydrogenases  
1137 (ICD and IDH) were used as loading controls. (B) Expression of NirS during exponential growth  
1138 of *P. aeruginosa* in MOPS-acetate and MOPS-acetate + sodium nitrate (20 mM). Sodium nitrate  
1139 (20 mM) is capable of inducing NirS expression in the WT and in a  $\Delta roxSR$  mutant, but not in a  
1140  $\Delta anr$  or  $\Delta dnr$  mutant. Three biological replicates per sample. The  $\Delta anr$ ,  $\Delta dnr$  and  $\Delta roxR$  lanes  
1141 are representative of the triplicates.

1142 **Figure S6;** Bacterial cell length as determined by fluorescence microscopy, PAO1 carrying the  
1143 pMF230 eGFP-expressing plasmid. Cells grown in MOPS media with acetate, glucose, glycerol  
1144 or succinate as the sole carbon sources. Actual data points shown in File S3.

1145 **Table S1;** A; Oligonucleotide primers used in this study. B; Bacterial strains and plasmids used in  
1146 this study [14,51,84,104].

1147 **File\_S1;** Full transcriptomics (tab A) and proteomics (tab B) of MOPS-acetate *versus* MOPS-  
1148 glycerol grown *P. aeruginosa*.

1149 **File\_S2;**  $^{13}\text{C}$  fluxomics data of MOPS acetate and MOPS glycerol grown *P. aeruginosa*, including  
1150 calculations for anabolic demand (A), OpenFLUX SimVector files (B), reaction network (C),  
1151 goodness of fit (D) and metabolic fluxes (E).

1152 **File\_S3;** Correlation plot calculations to illustrate the log<sub>2</sub> fold-change differences between the  
1153 transcriptomic, proteomic and fluxomic data (A-C) and cell size data (D).



Figure 1; Biochemical pathways involved in central carbon catabolism in *P. aeruginosa* PAO1.

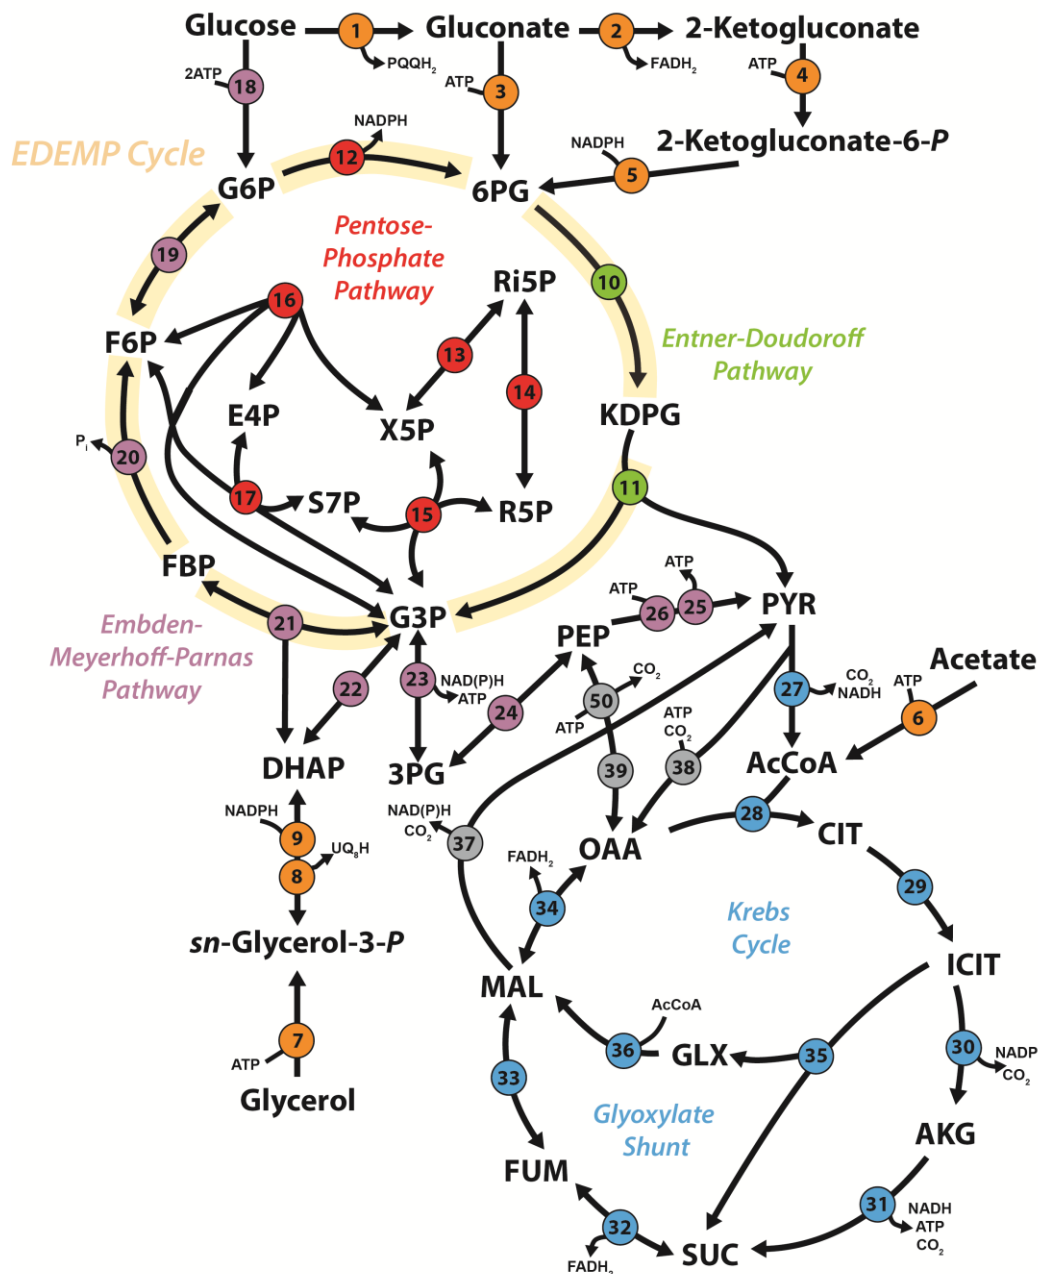

|                                  | Key | Enzyme(s)                                                        | PAO1 Gene Name(s) an PA number(s)                          |
|----------------------------------|-----|------------------------------------------------------------------|------------------------------------------------------------|
| PERIPHERAL PATHWAYS              | 1   | Glucose dehydrogenase                                            | PA2290 (Gcd)                                               |
|                                  | 2   | Gluconate 2-dehydrogenase                                        | PA2265 (Gad)                                               |
|                                  | 3   | Gluconate kinase                                                 | PA2321 (GntK)                                              |
|                                  | 4   | 2-Ketogluconate kinase                                           | PA2261 (KguK)                                              |
|                                  | 5   | 2-Ketogluconate-6-P- reductase                                   | PA2263 (KguD)                                              |
|                                  | 6   | Acetyl-CoA synthetase / Acetate kinase and Phosphotransacetylase | PA0887 (AcsA) / PA0836 (AckA), PA0835 (Pta)                |
|                                  | 7   | Glycerol Kinase                                                  | PA3582 (GlpK)                                              |
|                                  | 8   | sn-Glycerol-3-phosphate dehydrogenase                            | PA3584 (GlpD)                                              |
|                                  | 9   | Glycerol-3-phosphate dehydrogenase                               | PA1614 (GpsA)                                              |
| EDP                              | 10  | 6-Phosphogluconate dehydratase                                   | PA3194 (Edd)                                               |
|                                  | 11  | 2-Keto-3-deoxy-6-Phosphogluconate aldolase                       | PA3181 (Eda)                                               |
| PPP                              | 12  | Glucose-6-P-1-dehydrogenase                                      | PA5439, PA3183 (Zwf)                                       |
|                                  |     | 6-Phosphogluconolactonase                                        | PA3182 (Pgl)                                               |
|                                  | 13  | Ribulose-5-P-3-epimerase                                         | PA0607 (Rpe)                                               |
|                                  | 14  | Ribose-5-P- isomerase                                            | PA0330 (RpiA)                                              |
|                                  | 15  | Transketolase                                                    | PA0548 (TktA)                                              |
|                                  | 16  | Transaldolase B                                                  | PA2796 (Tal)                                               |
| EMPP                             | 18  | Glucokinase                                                      | PA3193 (Glc)                                               |
|                                  | 19  | Glucose-6-P- isomerase                                           | PA4732 (Pgi)                                               |
|                                  | 20  | Fructose-1,6-bisphosphatase                                      | PA5110 (Fbp)                                               |
|                                  | 21  | Fructose-1,6-P-2 aldolase                                        | PA0555 (Fda)                                               |
|                                  | 22  | Triose phosphate isomerase                                       | PA4748 (TpiA)                                              |
|                                  | 23  | Glyceraldehyde-3-P- dehydrogenase                                | PA3195 (GapA), PA3001, PA2323 (GapN)                       |
| KREBS CYCLE AND GLYOXYLATE SHUNT | 24  | Phosphoglycerate kinase                                          | PA0552 (Pggk)                                              |
|                                  | 24  | Phosphoglycerate mutase                                          | PA5131 (Pgm)                                               |
|                                  | 24  | Phosphopyruvate hydratase / Enolase                              | PA3635 (Eno)                                               |
|                                  | 25  | Pyruvate Kinase                                                  | PA4329 (PykA), PA1498 (PykF)                               |
| ANAPLEUROISIS                    | 26  | Phosphoenolpyruvate synthase                                     | PA1770 (PpsA)                                              |
|                                  | 27  | Pyruvate dehydrogenase                                           | PA5015 (AceE), PA5016 (AceF), PA4152 (AcoC), PA1587 (LpdG) |
|                                  | 28  | Citrate synthase                                                 | PA1580 (GltA), PA0795 (PrpC)                               |
|                                  | 29  | Aconitate synthase                                               | PA1562 (AcnA), PA1787 (AcnB)                               |
|                                  | 30  | Isocitrate dehydrogenase                                         | PA2623 (Icd), PA2624 (Idh)                                 |
|                                  | 31  | 2-Ketoglutarate dehydrogenase                                    | PA1585 (SucA), PA1586 (SucB), PA4829 (Lpd3)                |
|                                  | 31  | Succinyl-coenzyme A synthetase                                   | PA1588 (SucC), PA1589 (SucD)                               |
| GLUCONEOGENESIS                  | 32  | Succinate dehydrogenase                                          | PA1581 (SdhC), PA1582 (SdhD), PA1583 (SdhA), PA1584 (SdhB) |
|                                  | 33  | Fumarate hydratase                                               | PA4470 (FumC1), PA0854 (FumC2), PA4333 (FumA)              |
|                                  | 34  | Malate: quinone oxidoreductase                                   | PA3452 (MqoA), PA4640 (MqoB)                               |
|                                  | 35  | Isocitrate lyase                                                 | PA2634 (AceA)                                              |
| ANAPLEUROISIS                    | 36  | Malate synthase                                                  | PA0482 (GlcB)                                              |
|                                  | 37  | Malic enzyme                                                     | PA3471 (MaeA), PA5046 (MaeB)                               |
|                                  | 38  | Pyruvate carboxylase                                             | PA5435/PA5436 (PC)                                         |
|                                  | 39  | Phosphoenolpyruvate carboxylase                                  | PA3687 (Ppc)                                               |
|                                  | 40  | Phosphoenolpyruvate carboxykinase                                | PA5192 (PckA)                                              |

**Figure 2; Comparison between protein and transcript fold-changes for selected *P. aeruginosa* enzymes involved in**

**central carbon metabolism.** <https://doi.org/10.1101/828012>; this version posted November 4, 2019. The copyright holder for this preprint (which was not certified by peer review) is the author/funder. All rights reserved. No reuse allowed without permission.

| Key   | Gene          | PA01   | Protein Description                             | Log2(FC)_Protein | Log2(FC)_RNA |
|-------|---------------|--------|-------------------------------------------------|------------------|--------------|
| 1     | <i>gcd</i>    | PA2290 | Gcd, glucose dehydrogenase                      | -1.09            | -1.03        |
| 2     | <i>gnd</i>    | PA2265 | Gnd, gluconate dehydrogenase                    | -0.91            | -0.28        |
| 3     | <i>gntK</i>   | PA2321 | GntK, gluconokinase                             | -1.93            | -1.30        |
| 4     | <i>kguK</i>   | PA2261 | KguK, probable 2-ketogluconate kinase           | N/A              | -0.82        |
| 5     | <i>kguD</i>   | PA2263 | KguD, 2-hydroxyacid dehydrogenase               | 0.57             | -0.12        |
| 6     | <i>acsA</i>   | PA0887 | AcsA, acetyl-coenzyme A synthetase              | 2.47             | 4.69         |
|       | <i>ackA</i>   | PA0836 | AckA, acetate kinase                            | 0.6              | 0.51         |
|       | <i>pta</i>    | PA0835 | Pta, phosphate acetyltransferase                | 0.52             | 1.02         |
| 7     | <i>glpK</i>   | PA3582 | GlpK, glycerol kinase                           | -3.93            | -5.31        |
| 8     | <i>glpD</i>   | PA3584 | GlpD, glycerol-3-phosphate dehydrogenase        | -3.4             | -7.64        |
| 9     | <i>gpsA</i>   | PA1614 | GpsA, glycerol-3-phosphate dehydrogenase        | 0.25             | 0.25         |
| 10    | <i>edd</i>    | PA3194 | Edd, phosphogluconate dehydratase               | -3.53            | -4.21        |
| 11    | <i>eda</i>    | PA3181 | Eda, 2-keto-3-deoxy-6-phosphogluconate aldolase | -4.27            | -4.62        |
| 12    | <i>PA5439</i> | PA5439 | glucose-6-phosphate dehydrogenase               | 0.15             | 0.21         |
|       | <i>zwf</i>    | PA3183 | Zwf, glucose-6-phosphate 1-dehydrogenase        | -3.91            | -6.01        |
| 13    | <i>pgl</i>    | PA3182 | Pgl, 6-phosphogluconolactonase                  | -3.1             | -5.74        |
|       | <i>rpe</i>    | PA0607 | Rpe, ribulose-phosphate 3-epimerase             | 0.82             | 0.66         |
| 14    | <i>rpiA</i>   | PA0330 | RpiA, ribose 5-phosphate isomerase              | -0.06            | -0.17        |
| 15/16 | <i>tktA</i>   | PA0548 | TktA, transketolase                             | -0.05            | 0.03         |
| 17    | <i>tal</i>    | PA2796 | Tal, transaldolase                              | -0.63            | 0.29         |
| 18    | <i>glk</i>    | PA3193 | Glk, glucokinase                                | -2.1             | -2.87        |
| 19    | <i>pgi</i>    | PA4732 | Pgi, glucose-6-phosphate isomerase              | -0.11            | 0.12         |
| 20    | <i>fbp</i>    | PA5110 | Fbp, fructose-1,6-bisphosphatase                | 0.14             | -0.05        |
| 21    | <i>fda</i>    | PA0555 | Fda, fructose-1,6-bisphosphate aldolase         | 0.07             | -0.09        |
| 22    | <i>tpiA</i>   | PA4748 | TpiA, triosephosphate isomerase                 | 0.2              | 0.20         |
| 23    | <i>gapA</i>   | PA3195 | GapA, glyceraldehyde 3-phosphate dehydrogenase  | -3.76            | -4.67        |
|       | <i>PA3001</i> | PA3001 | glyceraldehyde-3-phosphate dehydrogenase        | 1.34             | 1.07         |
|       | <i>gapB</i>   | PA2323 | GapB, glyceraldehyde-3-phosphate dehydrogenase  | -2.79            | -2.49        |
|       | <i>pgk</i>    | PA0552 | Pgk, phosphoglycerate kinase                    | 0.86             | 0.88         |
| 24    | <i>pgm</i>    | PA5131 | Pgm, phosphoglycerate mutase                    | 0.13             | 0.20         |
|       | <i>eno</i>    | PA3635 | Eno, enolase                                    | 0.43             | 0.56         |
| 25    | <i>pykA</i>   | PA4329 | PykA, pyruvate kinase                           | 0.55             | 0.71         |
| 26    | <i>ppsA</i>   | PA1770 | PpsA, phosphoenolpyruvate synthase              | 0.32             | 0.20         |
| 27    | <i>aceE</i>   | PA5015 | AceE, pyruvate dehydrogenase                    | -2.24            | -0.51        |
|       | <i>aceF</i>   | PA5016 | AceF, dihydrolipoamide acetyltransferase        | -2.01            | -0.19        |
|       | <i>acoC</i>   | PA4152 | AcpC, hydrolase                                 | -0.04            | -0.21        |
|       | <i>lpdG</i>   | PA1587 | Lpd, dihydrolipoamide dehydrogenase             | 0.98             | 0.98         |
| 28    | <i>gltA</i>   | PA1580 | GltA, citrate synthase                          | 1.64             | 0.95         |
|       | <i>prpC</i>   | PA0795 | PrpC, citrate synthase 2                        | 0.52             | 1.31         |
| 29    | <i>acnA</i>   | PA1562 | AcnA, aconitate hydratase 1                     | -0.9             | -0.19        |
|       | <i>acnB</i>   | PA1787 | AcnB, aconitate hydratase 2                     | 2.16             | 1.96         |
| 30    | <i>icd</i>    | PA2623 | Icd, isocitrate dehydrogenase                   | -0.26            | 1.29         |
|       | <i>idh</i>    | PA2624 | Idh, isocitrate dehydrogenase                   | 2.34             | 1.79         |
| 31    | <i>sucA</i>   | PA1585 | SucA, 2-oxoglutarate dehydrogenase (E1)         | 1.45             | 1.01         |
|       | <i>sucB</i>   | PA1586 | SucB, dihydrolipoamide succinyltransferase (E2) | 1.25             | 1.01         |
| 32    | <i>sucC</i>   | PA1588 | SucC, succinyl-CoA synthetase beta chain        | 0.05             | 0.67         |
|       | <i>sucD</i>   | PA1589 | SucD, succinyl-CoA synthetase alpha chain       | 0.06             | 0.72         |
|       | <i>sdhC</i>   | PA1581 | SdhC, succinate dehydrogenase (C subunit)       | 1.46             | 0.60         |
|       | <i>sdhD</i>   | PA1582 | SdhD, succinate dehydrogenase (D subunit)       | 0.78             | 0.64         |
|       | <i>sdhA</i>   | PA1583 | SdhA, succinate dehydrogenase (A subunit)       | 1.31             | 0.85         |
|       | <i>sdhB</i>   | PA1584 | SdhB, succinate dehydrogenase (B subunit)       | 1.06             | 1.04         |
| 33    | <i>fumC1</i>  | PA4470 | FumC1, fumarate hydratase                       | 0.13             | -0.53        |
|       | <i>fumC2</i>  | PA0854 | FumC2, fumarate hydratase                       | -0.94            | 0.04         |
|       | <i>fumA</i>   | PA4333 | FumA, probable fumarase                         | 1.35             | 0.64         |
| 34    | <i>mqaA</i>   | PA3452 | MqaA, malate:quinone oxidoreductase             | -0.82            | -1.52        |
|       | <i>mqaB</i>   | PA4640 | MqaB, malate:quinone oxidoreductase             | 1.82             | 1.65         |
| 35    | <i>aceA</i>   | PA2634 | AceA, isocitrate lyase                          | 4.47             | 3.51         |
| 36    | <i>glcB</i>   | PA0482 | GlcB, malate synthase G                         | 2.56             | 1.98         |
| 37    | <i>maeA</i>   | PA3471 | MaeA, malic enzyme                              | 0.29             | 0.19         |
|       | <i>maeB</i>   | PA5046 | MaeB, Malic enzyme                              | -1.35            | -1.10        |
| 38    | <i>oadA</i>   | PA5435 | PC, pyruvate carboxylase                        | -1.25            | -0.93        |
|       | <i>accC</i>   | PA5436 | PC, pyruvate carboxylase                        | -1.1             | -0.75        |
| 39    | <i>ppc</i>    | PA3687 | Ppc, phosphoenolpyruvate carboxylase            | -0.42            | 0.10         |
| 40    | <i>pckA</i>   | PA5192 | PckA, phosphoenolpyruvate carboxykinase         | 1.32             | 0.96         |



Figure 3: Growth on different carbon sources primarily affects metabolism.

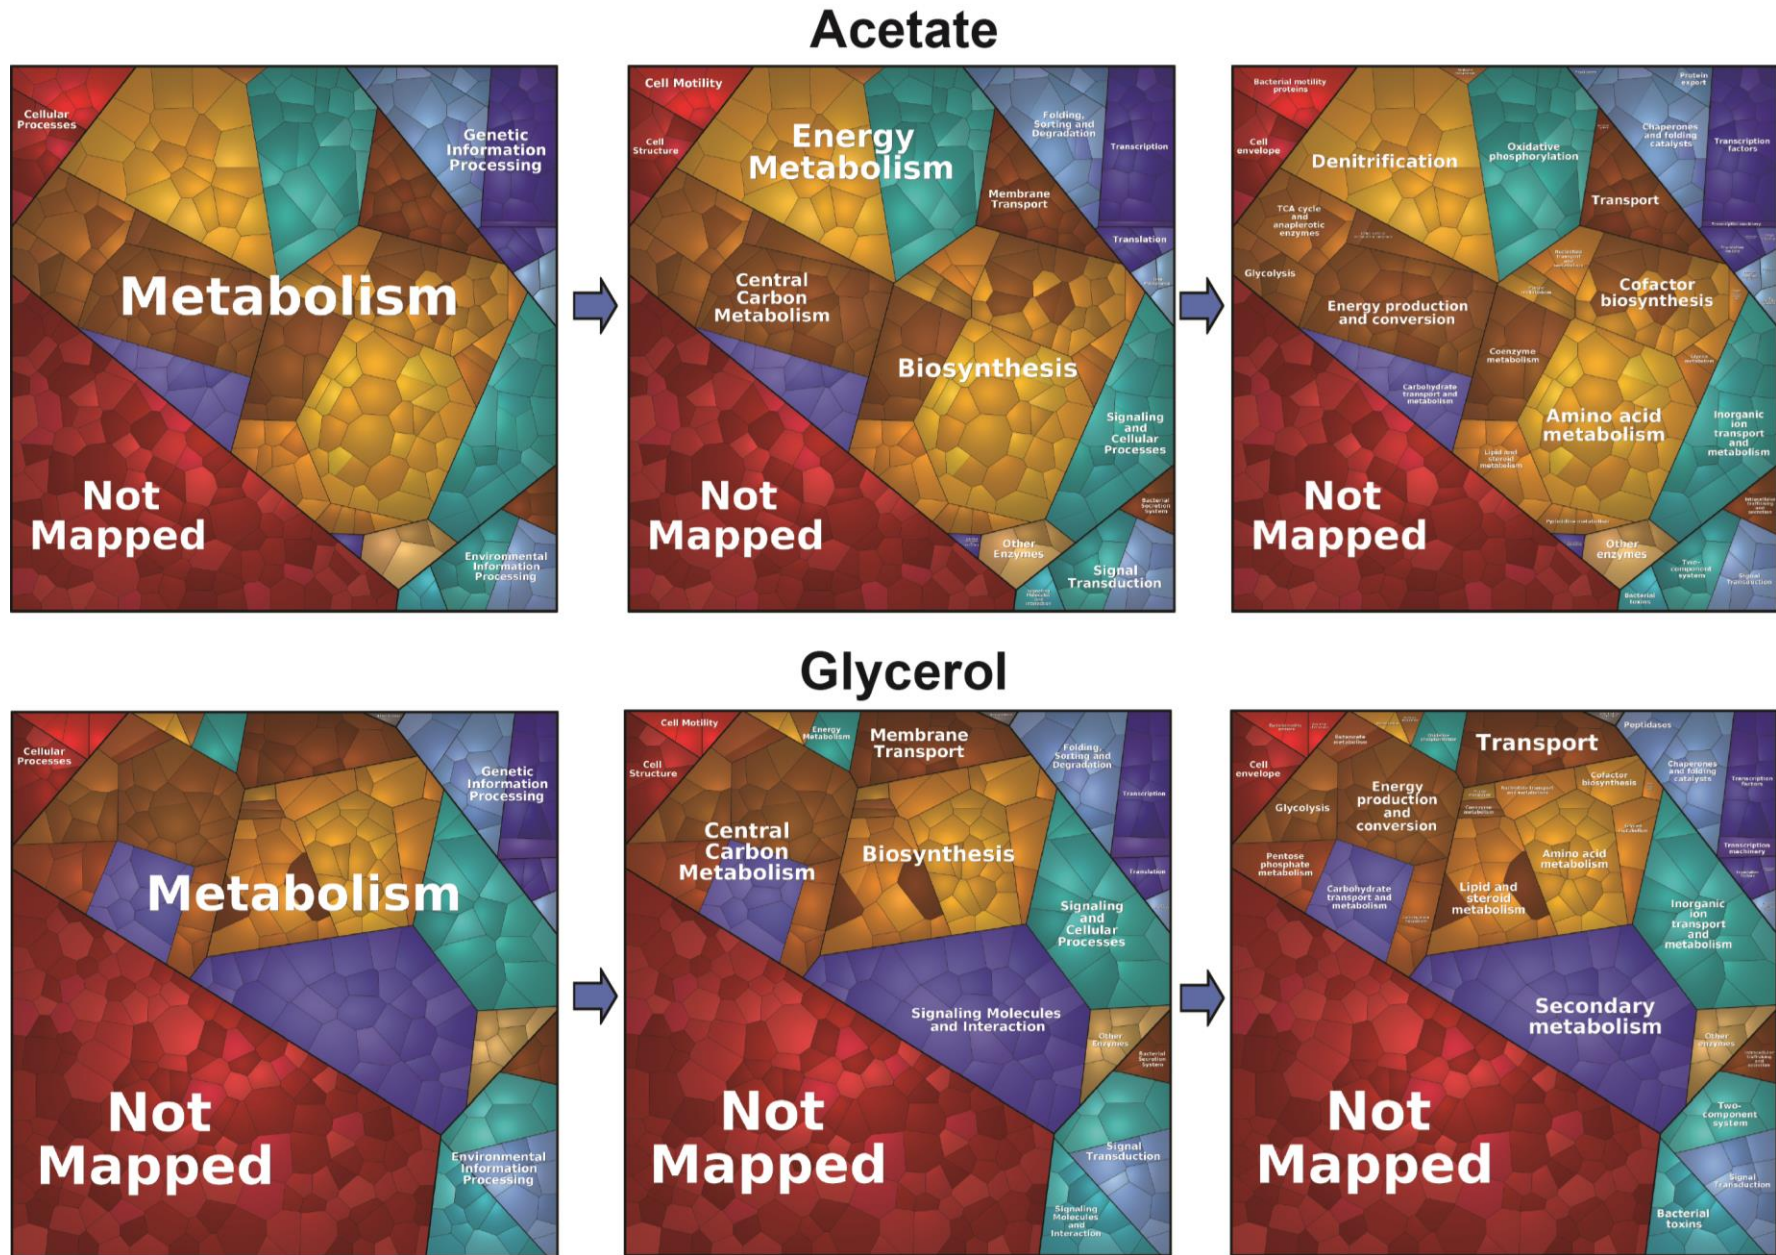

Figure 4; *In vivo* carbon flux distributions in central metabolism of *P. aeruginosa* PAO1 during growth on glycerol (A) or acetate (B) as sole carbon sources.

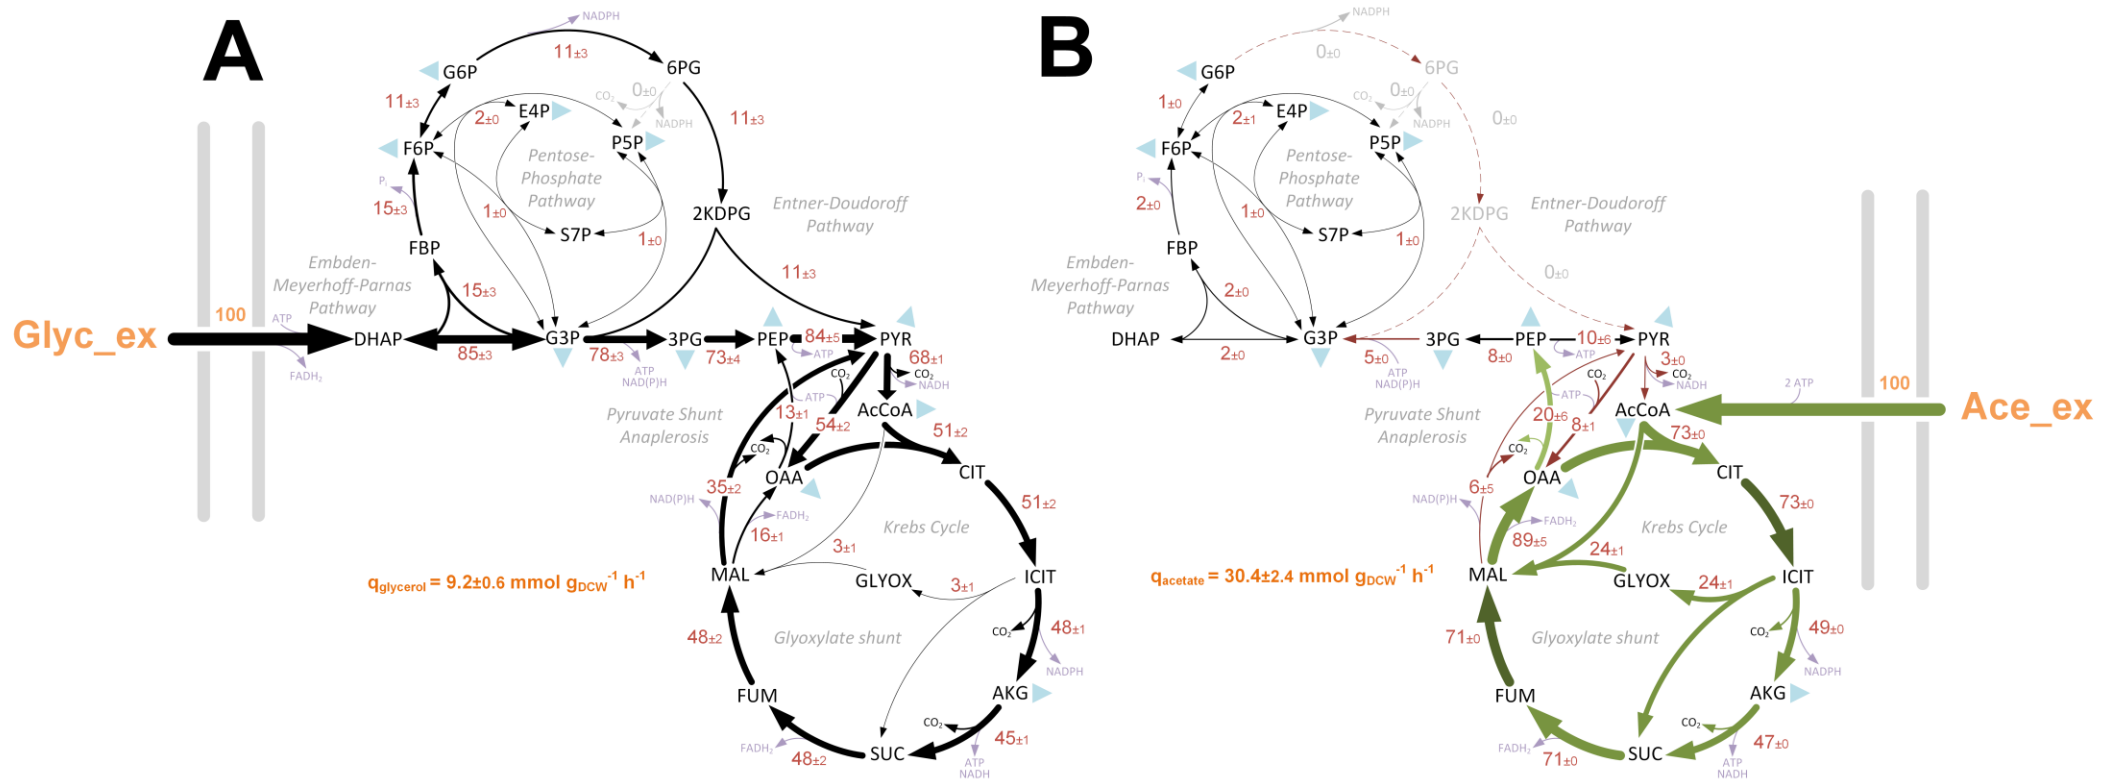

Figure 5; Quantitative analysis of NADPH supply and demand (redox) for glycerol (A) and acetate (B) grown *P. aeruginosa*.

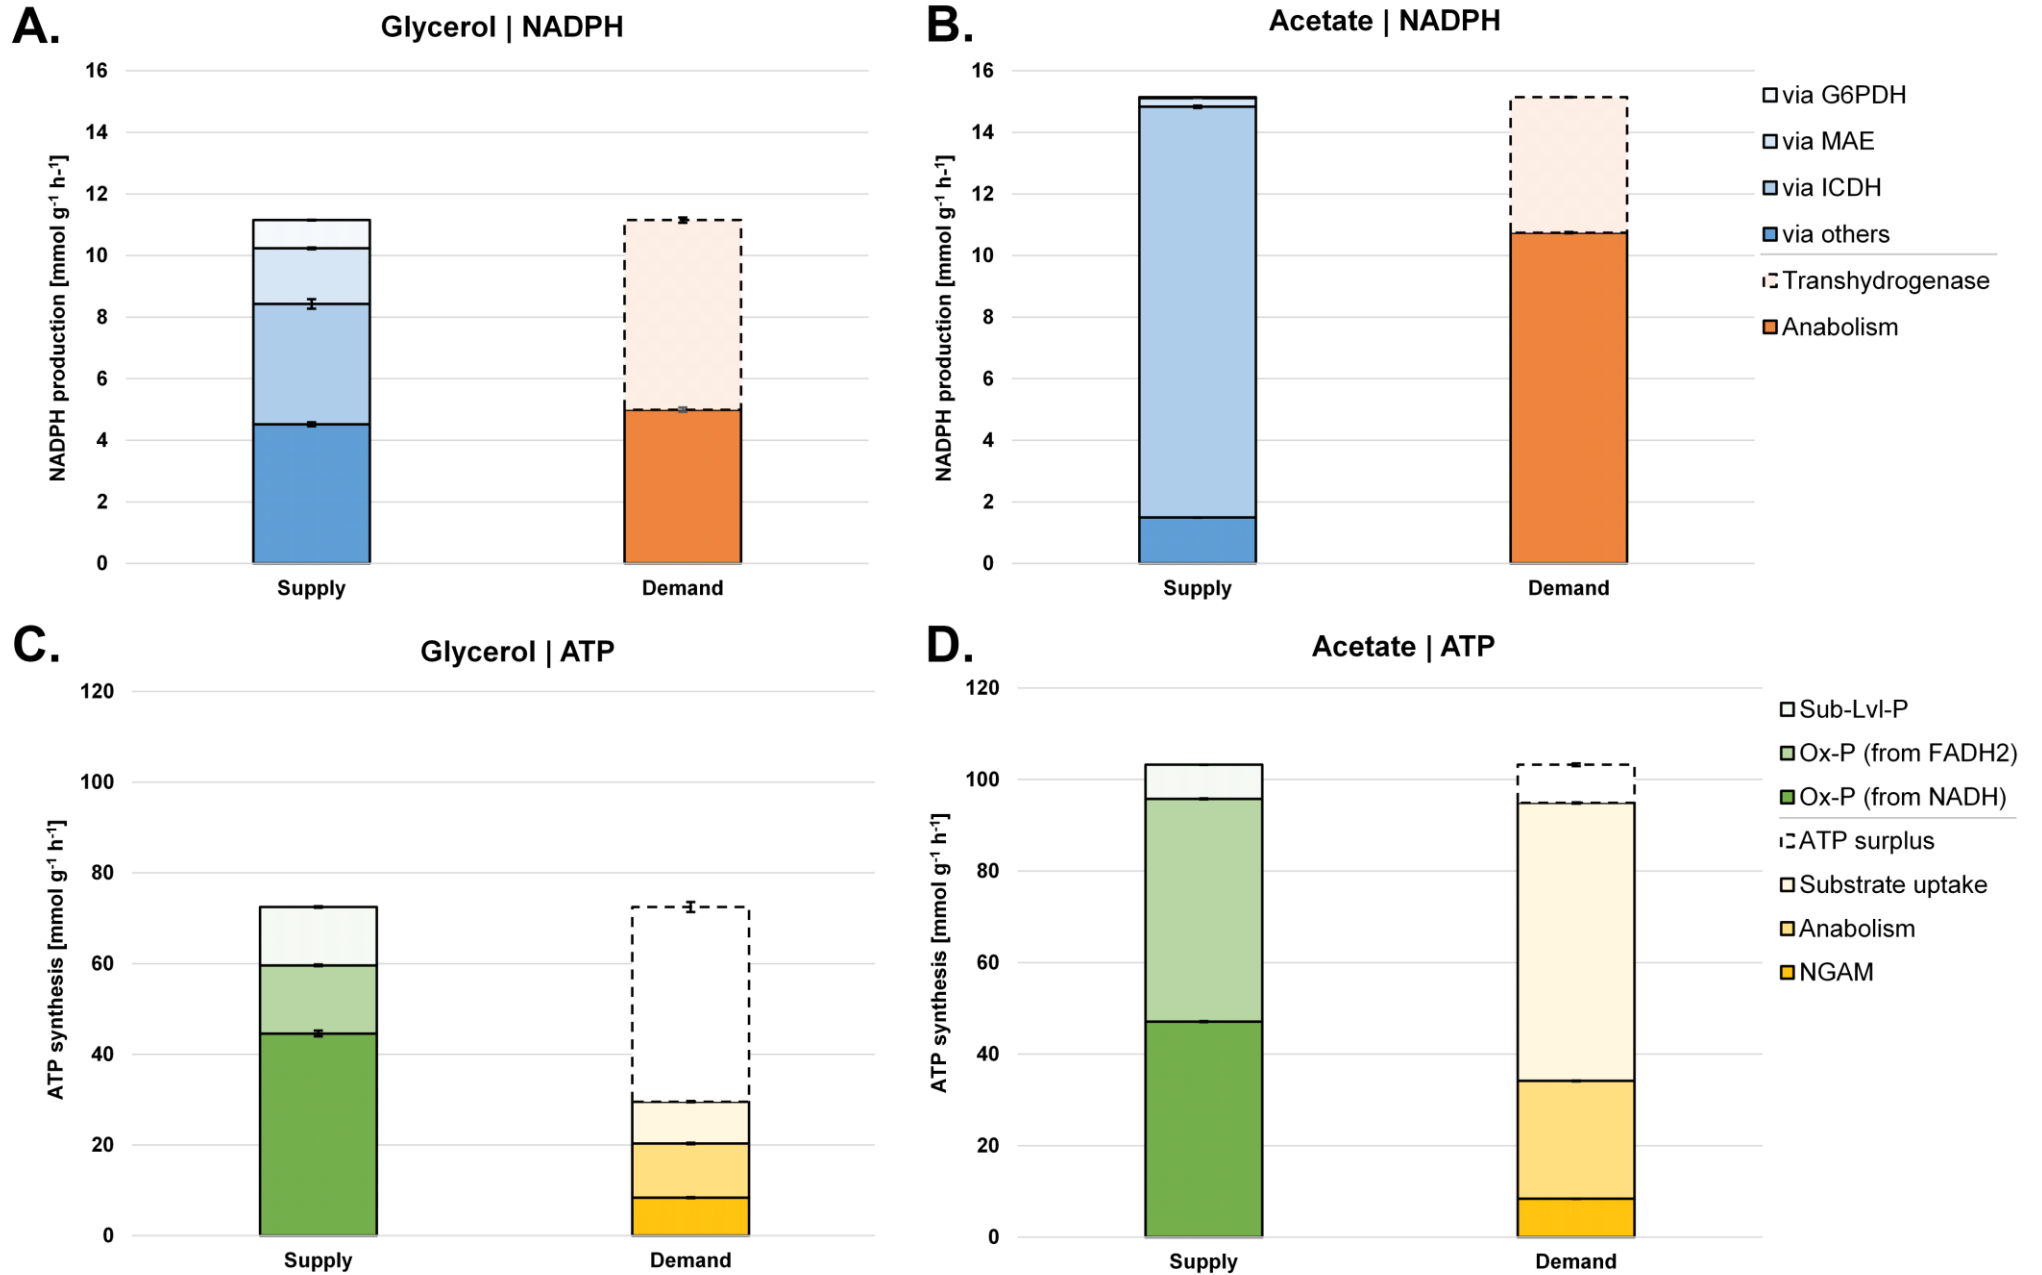

Figure 6; Maximal measured NADH:NAD<sup>+</sup> and NADPH:NADP<sup>+</sup> ratios in *P. aeruginosa* grown in the indicated sole carbon sources.

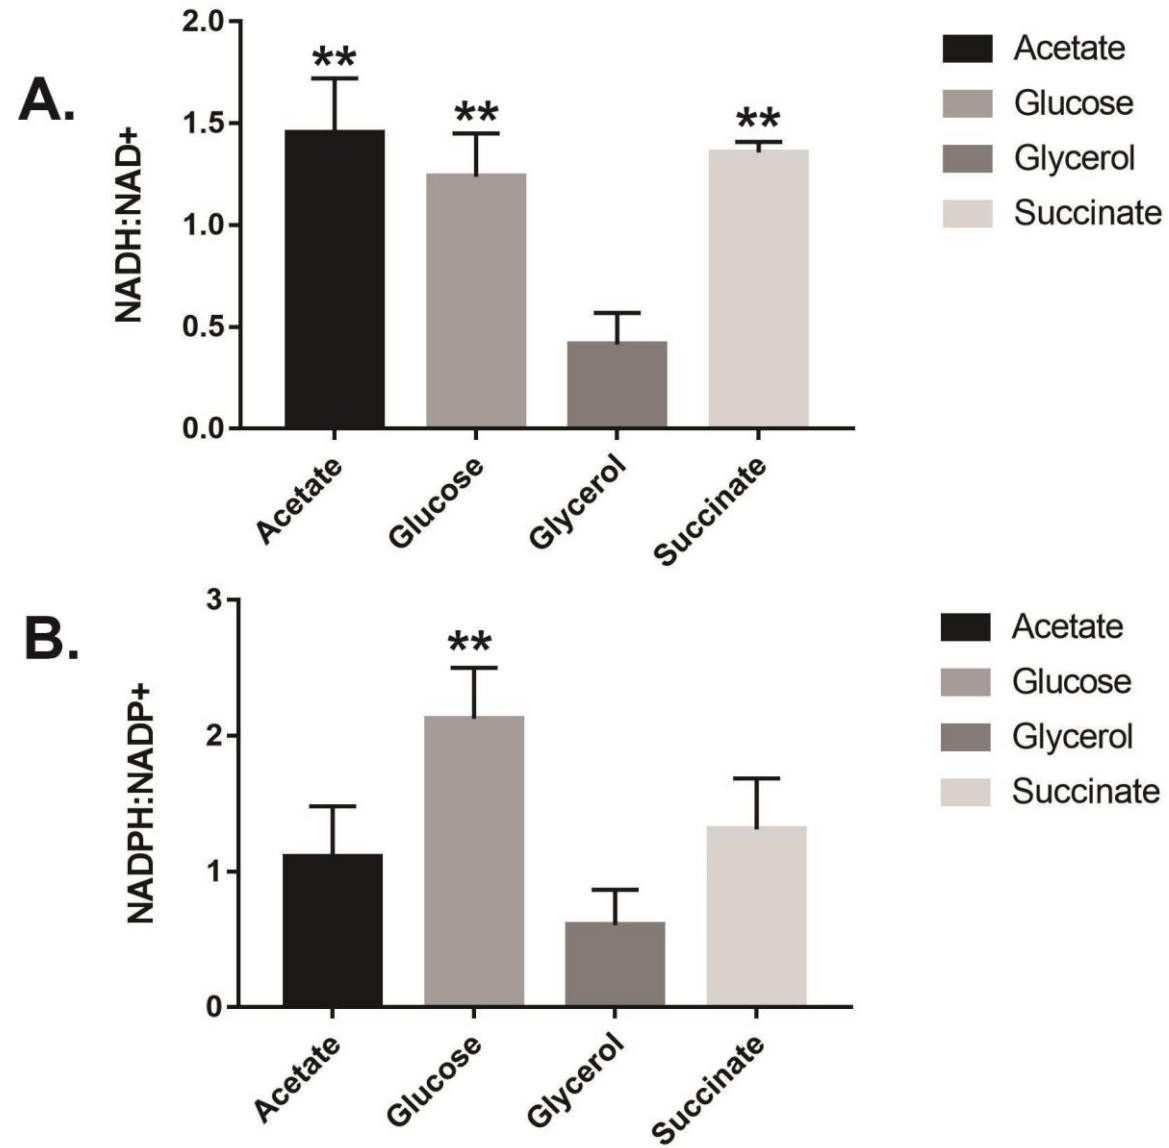

Figure 7; Coenzyme re-oxidation is impaired in a *dnr* mutant.

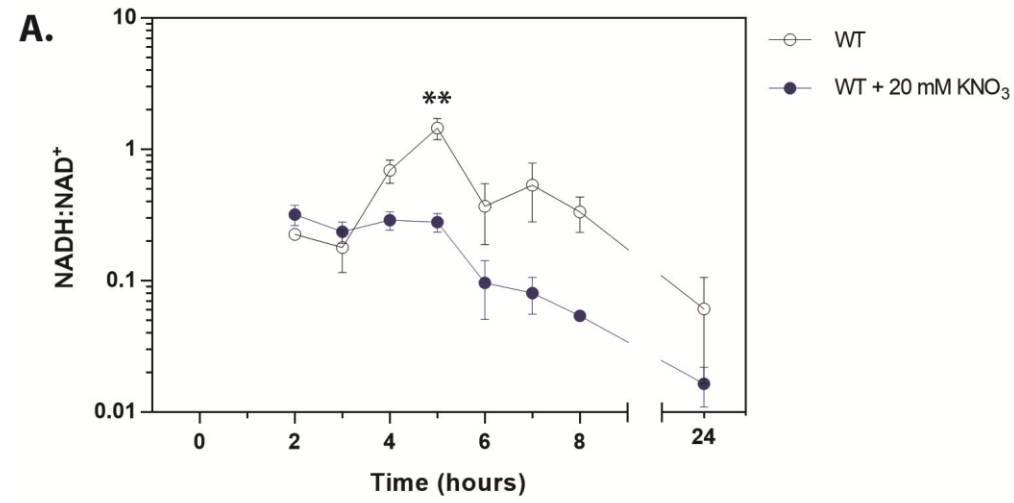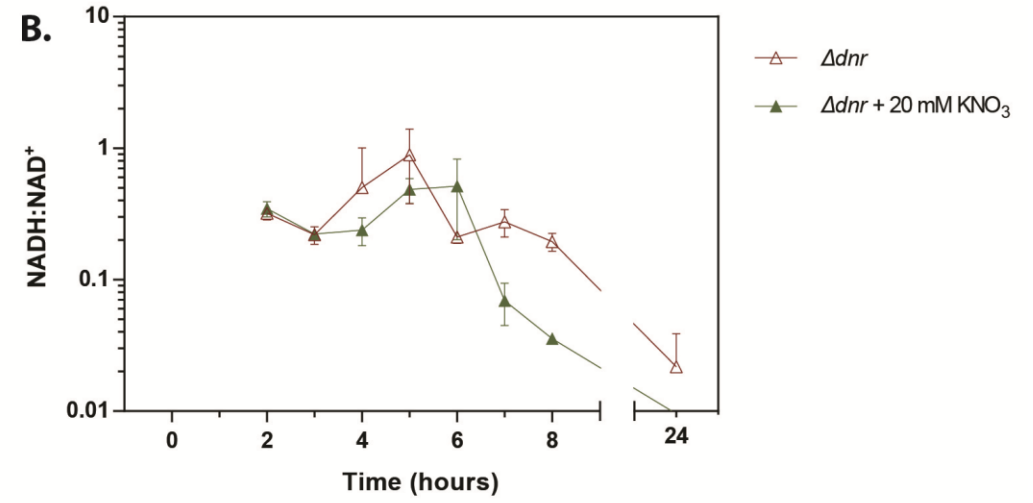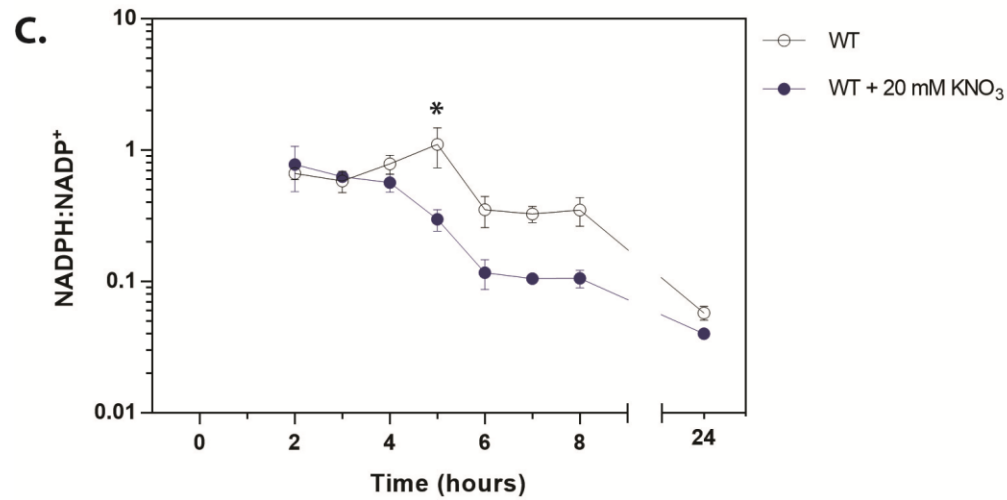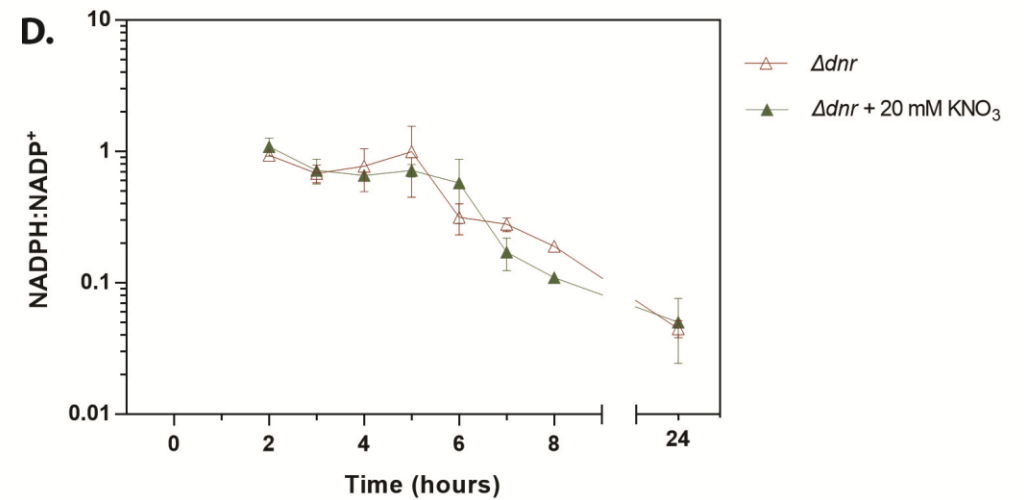

Source: https://www.biorxiv.org/content/10.1101/828012v1.full.pdf
